# Supplementary material for: Identification of the common differentially expressed genes and pathogenesis between neuropathic pain and aging
Source: Front Neurosci. 2022 Oct 19;16:994575. doi: 10.3389/fnins.2022.994575 (PMC9626798; doi:10.3389/fnins.2022.994575)
Supplement: Supplementary file 1 [file Data_Sheet_1.xlsx]

## Sheet: Supplemental Table1
Results of GO enrichment based on pain datasets.
ONTOLOGY	ID	Description	GeneRatio	BgRatio	pvalue	p.adjust	qvalue	geneID	Count
BP	GO:0042391	regulation of membrane potential	47/486	488/18112	2.94013e-14	1.42302e-10	1.14077e-10	497770/24577/24230/361430/24498/24166/29707/54296/78956/24596/361824/29477/500105/84488/24213/84008/84480/24806/301458/58950/29480/24211/81574/29739/24401/25456/58963/83810/246153/29738/29701/252857/25327/29571/116489/25736/25101/65195/29272/79123/266760/116745/29559/24602/25041/79246/114862	47
BP	GO:0071805	potassium ion transmembrane transport	27/486	218/18112	3.76802e-11	9.1186e-08	7.30995e-08	84550/54296/29639/24213/85267/259243/29737/116695/29480/25469/24211/295365/246153/29738/25327/116489/25736/65199/65195/29272/266760/116745/83588/117023/24602/306811/60326	27
BP	GO:0006813	potassium ion transport	28/486	249/18112	1.62433e-10	2.62059e-07	2.1008e-07	24166/84550/54296/29639/24213/85267/259243/29737/116695/29480/25469/24211/295365/246153/29738/25327/116489/25736/65199/65195/29272/266760/116745/83588/117023/24602/306811/60326	28
BP	GO:0010959	regulation of metal ion transport	38/486	453/18112	5.53578e-10	6.69829e-07	5.36971e-07	308113/29151/24617/25464/84604/24230/59086/24166/24215/81869/54296/83579/60395/84488/29639/314622/315579/259243/58950/29737/29480/63848/24211/50664/295365/246153/29738/25327/65199/288689/29272/117023/24602/306811/24241/309014/24247/24476	38
BP	GO:0035725	sodium ion transmembrane transport	22/486	168/18112	8.57722e-10	8.30275e-07	6.65592e-07	29464/497770/308113/84550/78956/84488/29639/613226/24213/85267/286920/63848/24211/81574/29701/29571/288689/79123/266760/24602/306811/114862	22
BP	GO:0048265	response to pain	11/486	44/18112	1.59845e-08	1.28942e-05	1.03367e-05	29151/24230/29244/78956/500105/24806/59109/83810/65199/29559/24241	11
BP	GO:0019233	sensory perception of pain	19/486	161/18112	6.75443e-08	4.67021e-05	3.74389e-05	497770/50654/24166/78956/24596/24806/286920/59109/81574/83810/29701/29571/116489/65199/79123/25265/24241/114862/24476	19
BP	GO:1901379	regulation of potassium ion transmembrane transport	14/486	93/18112	1.77625e-07	9.27292e-05	7.43366e-05	54296/29639/259243/29737/29480/295365/246153/29738/25327/65199/29272/117023/24602/306811	14
BP	GO:0001508	action potential	18/486	156/18112	2.10983e-07	9.27292e-05	7.43366e-05	497770/78956/500105/84488/84008/24806/58950/81574/246153/29738/29701/252857/29571/25736/65195/29272/116745/114862	18
BP	GO:0042060	wound healing	33/486	452/18112	2.14621e-07	9.27292e-05	7.43366e-05	60325/24232/361945/362248/25661/24653/64195/64519/309186/59107/309499/25216/171045/64467/24617/170819/295703/59086/304407/24498/302965/29499/79433/306400/361288/315579/312915/25531/112400/171048/25495/25265/116777	33
BP	GO:1904062	regulation of cation transmembrane transport	30/486	387/18112	2.16189e-07	9.27292e-05	7.43366e-05	29221/308113/84604/59086/50654/81869/54296/83579/84488/29639/314622/315579/259243/306722/58950/29737/29480/63848/295365/246153/29738/25327/65199/288689/29272/117023/24602/306811/171039/24476	30
BP	GO:0009612	response to mechanical stimulus	28/486	346/18112	2.29907e-07	9.27292e-05	7.43366e-05	27064/361945/64519/59107/29151/24577/171045/25112/64467/24617/81686/361430/59086/24498/24215/500105/84480/286920/59109/24211/81574/24401/360916/25327/116489/25265/25105/24602	28
BP	GO:0006816	calcium ion transport	33/486	457/18112	2.76176e-07	0.000102822	8.24279e-05	58965/29151/24617/24699/25464/24230/59086/24215/84550/81869/83579/365567/364601/60395/85267/314622/315579/58950/306243/29480/246771/50664/83810/24245/79123/266760/24602/24241/309014/29599/24247/114862/24476	33
BP	GO:0006814	sodium ion transport	23/486	250/18112	2.97775e-07	0.000102945	8.25262e-05	29464/497770/308113/59086/84550/78956/84488/29639/613226/24213/85267/286920/63848/24211/81574/29701/29571/288689/79123/266760/24602/306811/114862	23
BP	GO:0033555	multicellular organismal response to stress	15/486	115/18112	4.44255e-07	0.000143346	0.000114914	29151/24230/29244/24166/29707/78956/500105/24806/59109/83810/83632/65199/79123/29559/24241	15
BP	GO:0016048	detection of temperature stimulus	8/486	28/18112	4.91592e-07	0.000148707	0.000119211	24596/252880/24806/286920/59109/83810/309407/24241	8
BP	GO:0043266	regulation of potassium ion transport	15/486	117/18112	5.57228e-07	0.000158646	0.000127179	24166/54296/29639/259243/29737/29480/295365/246153/29738/25327/65199/29272/117023/24602/306811	15
BP	GO:0050951	sensory perception of temperature stimulus	8/486	32/18112	1.51368e-06	0.000395205	0.000316817	24806/286920/59109/83810/309510/309407/116489/24241	8
BP	GO:0051047	positive regulation of secretion	30/486	425/18112	1.55142e-06	0.000395205	0.000316817	27064/84046/24653/29151/54319/25216/59086/24498/24166/24675/79433/26989/24806/65152/85264/25531/312166/83810/29722/24877/252857/25736/29559/25196/25265/25105/303382/24602/24247/114862	30
BP	GO:1903532	positive regulation of secretion by cell	27/486	373/18112	3.24807e-06	0.000745619	0.000597728	27064/84046/24653/29151/54319/25216/59086/24498/24166/24675/79433/26989/24806/65152/85264/25531/312166/29722/24877/252857/25736/25196/25265/303382/24602/24247/114862	27
BP	GO:0002683	negative regulation of immune system process	30/486	441/18112	3.28359e-06	0.000745619	0.000597728	113937/114856/292594/84397/84046/289211/690899/29221/24577/54319/361537/54410/24699/113955/295703/362634/59086/315716/29185/29499/24166/83727/24675/315579/83514/289335/64036/680006/24241/81821	30
BP	GO:0032963	collagen metabolic process	14/486	118/18112	3.38918e-06	0.000745619	0.000597728	29175/25661/690899/59107/29221/29151/171045/65205/24617/81686/59086/50654/24498/24401	14
BP	GO:0010976	positive regulation of neuron projection development	20/486	228/18112	3.67881e-06	0.000774149	0.000620599	27064/85272/312299/24498/24166/306400/171500/24596/29477/81730/79253/58950/59109/112400/295365/29722/291713/24245/432358/117243	20
BP	GO:0070371	ERK1 and ERK2 cascade	26/486	355/18112	3.99412e-06	0.00080548	0.000645716	24232/113959/114856/25661/307403/308113/24577/54319/25389/24699/25464/113955/59086/24498/287910/24166/500105/59109/112400/317203/117038/25265/306811/24247/499349/24476	26
BP	GO:0051260	protein homooligomerization	18/486	193/18112	4.77676e-06	0.000924781	0.000741353	292657/24962/365567/29477/305792/116695/25469/83810/246153/25327/25736/65195/79123/24916/83588/117023/60326/24476	18
BP	GO:0048678	response to axon injury	14/486	125/18112	6.70644e-06	0.00124827	0.00100068	114122/54237/29221/361537/81686/24230/24312/29499/84480/58950/59109/112400/303311/25736	14
BP	GO:0048266	behavioral response to pain	7/486	28/18112	6.96349e-06	0.00124827	0.00100068	24230/78956/500105/59109/83810/65199/29559	7
BP	GO:0032412	regulation of ion transmembrane transporter activity	22/486	280/18112	7.31493e-06	0.00124827	0.00100068	308113/84604/50654/81869/83579/84488/29639/314622/306722/58950/29737/63848/295365/58963/246153/25327/288689/117023/24602/306811/79246/171039	22
BP	GO:0019228	neuronal action potential	9/486	51/18112	7.47929e-06	0.00124827	0.00100068	497770/78956/500105/81574/29701/252857/29571/29272/114862	9
BP	GO:0051899	membrane depolarization	12/486	95/18112	8.82678e-06	0.00136428	0.00109368	497770/24230/78956/24596/81574/29739/24401/29701/29571/25101/29559/114862	12
BP	GO:0032409	regulation of transporter activity	23/486	305/18112	8.94642e-06	0.00136428	0.00109368	308113/84604/50654/81869/83579/84488/29639/361089/314622/306722/58950/29737/63848/295365/58963/246153/25327/288689/117023/24602/306811/79246/171039	23
BP	GO:0009266	response to temperature stimulus	20/486	242/18112	9.02005e-06	0.00136428	0.00109368	291234/24653/309499/60350/24498/54296/78956/24596/29477/500105/252880/24797/65248/24806/286920/59109/83810/309407/116489/24241	20
BP	GO:0031099	regeneration	24/486	328/18112	9.52152e-06	0.00139649	0.0011195	291234/114122/113959/361945/54237/83807/50692/24577/312299/170896/24617/84604/81686/24230/24312/59086/24498/29499/361368/303547/58950/112400/303311/432358	24
BP	GO:0070372	regulation of ERK1 and ERK2 cascade	24/486	330/18112	1.05404e-05	0.00148661	0.00119175	24232/113959/114856/25661/307403/308113/54319/25389/24699/25464/113955/59086/24498/287910/24166/59109/112400/317203/117038/25265/306811/24247/499349/24476	24
BP	GO:0019226	transmission of nerve impulse	12/486	97/18112	1.09674e-05	0.00148661	0.00119175	497770/24498/78956/500105/84008/58950/81574/29701/252857/29571/29272/114862	12
BP	GO:0007409	axonogenesis	31/486	493/18112	1.10575e-05	0.00148661	0.00119175	85272/25661/307403/302965/29499/93667/79433/306400/24596/29477/500105/84488/252880/171572/84008/57233/25531/84409/59109/112400/116658/295382/295365/303311/29722/305571/25495/311134/266777/117038/306790	31
BP	GO:0014074	response to purine-containing compound	19/486	227/18112	1.25813e-05	0.00164577	0.00131934	114856/64519/25620/54319/25216/24795/24617/24498/81869/81718/60395/65248/29711/83810/727679/25196/25265/25041/25698	19
BP	GO:0022898	regulation of transmembrane transporter activity	22/486	291/18112	1.34388e-05	0.00168149	0.00134797	308113/84604/50654/81869/83579/84488/29639/314622/306722/58950/29737/63848/295365/58963/246153/25327/288689/117023/24602/306811/79246/171039	22
BP	GO:0046888	negative regulation of hormone secretion	12/486	99/18112	1.35492e-05	0.00168149	0.00134797	24484/29151/170896/24230/24498/83727/58950/24258/112400/24877/25736/25196	12
BP	GO:0002455	humoral immune response mediated by circulating immunoglobulin	9/486	55/18112	1.42138e-05	0.00171987	0.00137874	24232/289211/298566/29687/24699/295703/362634/289335/64036	9
BP	GO:0070997	neuron death	29/486	454/18112	1.58696e-05	0.00187339	0.00150181	113959/289211/298566/29151/361537/113955/24618/290655/24498/29499/29707/24596/29477/117520/300186/25417/84480/288753/24806/24258/113893/59109/29739/300652/24245/25736/65199/117038/24417	29
BP	GO:0014075	response to amine	11/486	85/18112	1.65088e-05	0.00190244	0.0015251	54237/29221/25464/24675/54296/29480/54290/246153/25327/79123/25698	11
BP	GO:0071496	cellular response to external stimulus	28/486	433/18112	1.77902e-05	0.00200243	0.00160525	27064/361945/59107/170896/56759/171045/25112/25389/24617/24699/25464/289801/361430/59086/24498/306400/84480/65248/24211/24401/312166/360916/116489/25736/25196/25105/24602/24247	28
BP	GO:0070664	negative regulation of leukocyte proliferation	12/486	102/18112	1.84153e-05	0.00202568	0.00162389	292594/84046/289211/690899/29221/361537/54410/113955/59086/315716/29499/680006	12
BP	GO:0002761	regulation of myeloid leukocyte differentiation	14/486	137/18112	1.93381e-05	0.00207992	0.00166738	113937/292594/84397/307403/25056/24577/361537/362634/59086/83727/315579/54231/288689/24241	14
BP	GO:0009582	detection of abiotic stimulus	14/486	138/18112	2.10029e-05	0.00220988	0.00177155	24577/361430/24215/84550/24596/252880/24806/286920/59109/81574/83810/309407/116489/24241	14
BP	GO:0009581	detection of external stimulus	14/486	139/18112	2.27927e-05	0.00234716	0.00188161	24577/361430/24215/84550/24596/252880/24806/286920/59109/81574/83810/309407/116489/24241	14
BP	GO:0046883	regulation of hormone secretion	23/486	325/18112	2.47839e-05	0.00246811	0.00197857	84046/24484/29151/170896/24230/24498/24166/83727/24675/24806/65152/58950/24258/85264/112400/24877/81024/25736/25196/25265/303382/24602/24247	23
BP	GO:0000302	response to reactive oxygen species	21/486	281/18112	2.49871e-05	0.00246811	0.00197857	114856/25661/24653/54237/29221/312299/25216/24617/81686/24618/246240/24312/29244/24498/81005/84480/65248/58950/50664/117038/24916	21
BP	GO:0051384	response to glucocorticoid	22/486	304/18112	2.6406e-05	0.0025561	0.0020491	24232/116685/114856/25661/24653/29221/29151/309122/25216/170896/24795/29687/24617/25464/59086/24498/24166/81718/362029/29711/24401/25698	22
BP	GO:0034764	positive regulation of transmembrane transport	20/486	263/18112	3.03039e-05	0.0028759	0.00230547	24232/25236/308113/50654/81869/54296/24183/65248/54231/295365/58963/246153/25327/288689/29272/24602/117243/306811/79246/24476	20
BP	GO:0010940	positive regulation of necrotic cell death	5/486	15/18112	3.27514e-05	0.0030484	0.00244376	29464/246240/24230/84480/117038	5
BP	GO:0031960	response to corticosteroid	23/486	332/18112	3.46114e-05	0.00316074	0.00253382	24232/116685/114856/25661/24653/29221/29151/309122/25216/170896/24795/29687/24617/25464/66021/59086/24498/24166/81718/362029/29711/24401/25698	23
BP	GO:0042542	response to hydrogen peroxide	17/486	204/18112	3.78053e-05	0.00334399	0.00268072	114856/24653/54237/29221/312299/25216/24617/81686/24618/246240/24498/81005/84480/65248/58950/50664/24916	17
BP	GO:0043270	positive regulation of ion transport	23/486	334/18112	3.79999e-05	0.00334399	0.00268072	24653/308113/29151/24617/24230/50654/24215/81869/54296/60395/295365/58963/246153/25327/288689/29272/29559/25265/24602/306811/79246/24247/24476	23
BP	GO:0060538	skeletal muscle organ development	18/486	225/18112	3.87285e-05	0.00334725	0.00268333	27064/84046/29279/83807/307403/309122/24577/25389/59086/29499/361368/24596/500105/84008/65248/29737/83514/25698	18
BP	GO:0002707	negative regulation of lymphocyte mediated immunity	9/486	63/18112	4.37574e-05	0.00371554	0.00297858	113937/292594/289211/690899/29221/24699/24675/289335/64036	9
BP	GO:0062197	cellular response to chemical stress	26/486	408/18112	4.52244e-05	0.0037739	0.00302536	54237/83807/29221/24577/312299/171045/24617/81686/24618/246240/24230/24312/29244/24498/171500/24596/365567/29477/29639/117520/84480/65248/288753/306722/117038/24916	26
BP	GO:0042063	gliogenesis	25/486	385/18112	4.65991e-05	0.0038227	0.00306448	114122/113959/25661/84046/298566/307403/24577/312299/24230/59086/24498/29499/24166/500105/84008/84480/102552664/112400/57033/297453/25495/117038/24916/25265/315691	25
BP	GO:0050672	negative regulation of lymphocyte proliferation	11/486	96/18112	5.23698e-05	0.00417493	0.00334684	292594/84046/289211/690899/29221/361537/113955/59086/315716/29499/680006	11
BP	GO:1903531	negative regulation of secretion by cell	16/486	189/18112	5.26179e-05	0.00417493	0.00334684	64519/24484/29151/170896/24230/24498/83727/314622/58950/24258/112400/24877/25736/79123/25196/25265	16
BP	GO:0032945	negative regulation of mononuclear cell proliferation	11/486	97/18112	5.76655e-05	0.00450163	0.00360874	292594/84046/289211/690899/29221/361537/113955/59086/315716/29499/680006	11
BP	GO:0051259	protein complex oligomerization	19/486	255/18112	6.27537e-05	0.00475654	0.00381309	292657/24962/365567/29477/305792/116695/25469/83810/246153/25327/309407/25736/65195/79123/24916/83588/117023/60326/24476	19
BP	GO:1903522	regulation of blood circulation	20/486	277/18112	6.28964e-05	0.00475654	0.00381309	24886/29151/25464/81686/29244/84488/24806/58950/29480/24258/24211/50664/83810/29571/65195/116745/24602/24241/24247/114862	20
BP	GO:0002526	acute inflammatory response	13/486	135/18112	7.09803e-05	0.0052853	0.00423698	24232/117540/25661/289211/24653/25464/84604/24618/24498/24166/24806/83810/25698	13
BP	GO:0050878	regulation of body fluid levels	26/486	421/18112	7.59701e-05	0.00557114	0.00446612	24232/362248/25661/24653/64519/309186/29151/64355/64467/24617/360468/24268/295703/304407/24498/29499/24215/81718/361288/24806/315579/83514/171048/25265/25105/24602	26
BP	GO:0002762	negative regulation of myeloid leukocyte differentiation	8/486	53/18112	7.78248e-05	0.00562197	0.00450687	113937/292594/84397/24577/362634/83727/315579/24241	8
BP	GO:1990089	response to nerve growth factor	10/486	84/18112	8.23668e-05	0.00573873	0.00460047	24617/116659/24806/59109/83810/246153/252857/25327/432358/24241	10
BP	GO:0071260	cellular response to mechanical stimulus	13/486	137/18112	8.26054e-05	0.00573873	0.00460047	27064/59107/25112/24617/361430/59086/84480/24211/24401/360916/116489/25105/24602	13
BP	GO:0006958	complement activation, classical pathway	7/486	40/18112	8.29981e-05	0.00573873	0.00460047	24232/298566/29687/295703/362634/289335/64036	7
BP	GO:0060572	morphogenesis of an epithelial bud	5/486	18/18112	8.74154e-05	0.00594371	0.00476479	85272/353252/24695/29499/25495	5
BP	GO:0006953	acute-phase response	8/486	54/18112	8.92423e-05	0.00594371	0.00476479	117540/25661/24653/84604/24618/24498/83810/25698	8
BP	GO:0070588	calcium ion transmembrane transport	22/486	331/18112	9.39595e-05	0.00594371	0.00476479	24699/59086/24215/84550/81869/83579/365567/364601/60395/85267/314622/315579/58950/306243/246771/83810/79123/266760/24602/29599/114862/24476	22
BP	GO:0060047	heart contraction	18/486	241/18112	9.43741e-05	0.00594371	0.00476479	29151/29244/84488/24213/24806/58950/29480/24258/24211/81574/50664/83810/29571/65195/116745/24602/24241/114862	18
BP	GO:0009191	ribonucleoside diphosphate catabolic process	4/486	10/18112	9.45591e-05	0.00594371	0.00476479	64519/64467/58813/361063	4
BP	GO:0072203	cell proliferation involved in metanephros development	4/486	10/18112	9.45591e-05	0.00594371	0.00476479	25236/85272/24577/29499	4
BP	GO:0098883	synapse pruning	4/486	10/18112	9.45591e-05	0.00594371	0.00476479	24232/298566/29687/362634	4
BP	GO:0035637	multicellular organismal signaling	14/486	159/18112	0.000100393	0.00622891	0.00499342	497770/24498/78956/500105/84008/58950/81574/29701/252857/29571/65195/29272/116745/114862	14
BP	GO:0060571	morphogenesis of an epithelial fold	6/486	29/18112	0.00010167	0.00622891	0.00499342	85272/353252/24695/29499/79428/25495	6
BP	GO:1901214	regulation of neuron death	25/486	406/18112	0.000108951	0.00659152	0.00528411	113959/289211/298566/29151/361537/113955/24618/290655/24498/29499/29707/24596/29477/117520/300186/24806/24258/113893/59109/29739/300652/25736/65199/117038/24417	25
BP	GO:0001101	response to acid chemical	20/486	289/18112	0.000112581	0.00672705	0.00539276	64519/29221/24577/171045/85251/25464/81686/24618/66021/24498/81718/24797/59109/29739/295365/25456/309510/24245/25736/25698	20
BP	GO:0045779	negative regulation of bone resorption	5/486	19/18112	0.00011603	0.00676609	0.00542406	84604/24498/315579/24241/24476	5
BP	GO:0050884	neuromuscular process controlling posture	5/486	19/18112	0.00011603	0.00676609	0.00542406	29244/500105/84008/81574/360916	5
BP	GO:0007218	neuropeptide signaling pathway	11/486	105/18112	0.000119192	0.00686773	0.00550553	29151/60417/24166/24806/192251/25456/300652/252960/25105/24602/24241	11
BP	GO:0008016	regulation of heart contraction	16/486	203/18112	0.000122734	0.00695646	0.00557667	29151/29244/84488/24806/58950/29480/24258/24211/50664/83810/29571/65195/116745/24602/24241/114862	16
BP	GO:0050890	cognition	24/486	385/18112	0.000123607	0.00695646	0.00557667	113959/294269/29151/29707/84550/29477/500105/84488/24213/140666/24806/29737/311730/59109/112400/309510/305268/29722/116489/83632/25495/79123/432358/24417	24
BP	GO:0034331	cell junction maintenance	8/486	57/18112	0.000132109	0.00734951	0.00589176	81717/307403/361824/500105/84008/363058/25531/81821	8
BP	GO:0010939	regulation of necrotic cell death	7/486	43/18112	0.000133837	0.00736105	0.00590101	29464/83807/29151/246240/24230/84480/117038	7
BP	GO:0070663	regulation of leukocyte proliferation	19/486	271/18112	0.000140217	0.00759041	0.00608488	292594/84046/289211/690899/307403/29221/361537/54410/24699/113955/246240/59086/315716/24498/29499/25368/24806/64036/680006	19
BP	GO:0002449	lymphocyte mediated immunity	21/486	317/18112	0.000141144	0.00759041	0.00608488	113937/24232/292594/289211/690899/298566/294269/29221/29687/24699/25464/360468/295703/362634/246240/59086/24498/24675/363058/289335/64036	21
BP	GO:0001503	ossification	26/486	438/18112	0.000143922	0.00760625	0.00609757	25236/29175/85272/25661/84397/84046/24653/24484/24477/25695/65205/113955/81686/24695/59086/315716/24498/29499/85267/24806/81733/25495/25444/306790/24241/24247	26
BP	GO:0046879	hormone secretion	24/486	389/18112	0.000144582	0.00760625	0.00609757	84046/24484/29151/170896/24230/24498/24166/83727/24675/24806/65152/58950/24258/85264/112400/24877/81024/252857/25736/25196/25265/303382/24602/24247	24
BP	GO:0006956	complement activation	8/486	58/18112	0.0001497	0.00762743	0.00611455	24232/298566/29687/54249/295703/362634/289335/64036	8
BP	GO:0003018	vascular process in circulatory system	18/486	250/18112	0.000149927	0.00762743	0.00611455	24886/292657/29151/25464/81686/59086/29244/24166/306400/24258/29739/25265/25323/25105/24602/24241/24247/499349	18
BP	GO:0086010	membrane depolarization during action potential	6/486	31/18112	0.000150584	0.00762743	0.00611455	497770/78956/81574/29701/29571/114862	6
BP	GO:0050965	detection of temperature stimulus involved in sensory perception of pain	5/486	20/18112	0.000151312	0.00762743	0.00611455	24806/286920/59109/83810/24241	5
BP	GO:0043271	negative regulation of ion transport	15/486	186/18112	0.000154124	0.00762743	0.00611455	64519/25464/84604/59086/24166/81869/83579/29639/314622/58950/29737/29480/50664/306811/24241	15
BP	GO:1901381	positive regulation of potassium ion transmembrane transport	7/486	44/18112	0.000155521	0.00762743	0.00611455	54296/295365/246153/25327/29272/24602/306811	7
BP	GO:0003015	heart process	18/486	251/18112	0.000157592	0.00762743	0.00611455	29151/29244/84488/24213/24806/58950/29480/24258/24211/81574/50664/83810/29571/65195/116745/24602/24241/114862	18
BP	GO:0097485	neuron projection guidance	18/486	251/18112	0.000157592	0.00762743	0.00611455	85272/307403/29499/79433/306400/24596/252880/25417/57233/84409/59109/116658/303311/29722/305571/25495/311134/306790	18
BP	GO:2000377	regulation of reactive oxygen species metabolic process	14/486	167/18112	0.000169167	0.00790593	0.00633781	361537/171045/25112/246240/24230/24312/59086/29244/306840/24596/29477/84480/84356/117038	14
BP	GO:0002823	negative regulation of adaptive immune response based on somatic recombination of immune receptors built from immunoglobulin superfamily domains	8/486	59/18112	0.000169175	0.00790593	0.00633781	292594/289211/690899/29221/24699/24675/289335/64036	8
BP	GO:0007519	skeletal muscle tissue development	16/486	209/18112	0.000171957	0.00790593	0.00633781	27064/84046/29279/83807/307403/309122/24577/25389/59086/29499/24596/500105/84008/65248/29737/83514	16
BP	GO:0002698	negative regulation of immune effector process	12/486	128/18112	0.000172589	0.00790593	0.00633781	113937/292594/289211/690899/29221/54410/24699/295703/59086/24675/289335/64036	12
BP	GO:0014013	regulation of gliogenesis	12/486	128/18112	0.000172589	0.00790593	0.00633781	84046/24577/312299/24230/59086/24498/29499/24166/112400/25495/24916/315691	12
BP	GO:0032944	regulation of mononuclear cell proliferation	18/486	253/18112	0.000173958	0.00790593	0.00633781	292594/84046/289211/690899/307403/29221/361537/24699/113955/246240/59086/315716/24498/29499/25368/24806/64036/680006	18
BP	GO:0017156	calcium-ion regulated exocytosis	9/486	75/18112	0.00017478	0.00790593	0.00633781	24675/26989/314622/25731/25531/312166/252857/25736/114862	9
BP	GO:0010712	regulation of collagen metabolic process	8/486	60/18112	0.000190687	0.0085456	0.0068506	25661/690899/59107/29151/24617/59086/24498/24401	8
BP	GO:0002704	negative regulation of leukocyte mediated immunity	9/486	76/18112	0.000193627	0.00854662	0.00685142	113937/292594/289211/690899/29221/24699/24675/289335/64036	9
BP	GO:0046851	negative regulation of bone remodeling	5/486	21/18112	0.000194241	0.00854662	0.00685142	84604/24498/315579/24241/24476	5
BP	GO:0032355	response to estradiol	18/486	257/18112	0.000211212	0.008852	0.00709623	24232/114856/361945/54227/85272/289211/24484/29151/24577/312299/171045/81686/24618/59086/24498/29499/24183/25698	18
BP	GO:0006534	cysteine metabolic process	4/486	12/18112	0.00021355	0.008852	0.00709623	24962/81718/25274/29739	4
BP	GO:0010721	negative regulation of cell development	16/486	213/18112	0.000213613	0.008852	0.00709623	361945/85272/84046/363088/24230/24695/59086/24166/83727/84488/83810/300652/25495/117038/306790/315691	16
BP	GO:0045670	regulation of osteoclast differentiation	9/486	77/18112	0.000214135	0.008852	0.00709623	113937/292594/84397/307403/361537/83727/315579/54231/24241	9
BP	GO:0070374	positive regulation of ERK1 and ERK2 cascade	17/486	235/18112	0.000214816	0.008852	0.00709623	24232/113959/307403/24699/25464/113955/59086/24498/287910/24166/59109/112400/117038/25265/24247/499349/24476	17
BP	GO:0002478	antigen processing and presentation of exogenous peptide antigen	6/486	33/18112	0.000216461	0.008852	0.00709623	289211/294269/290644/362431/50654/301388	6
BP	GO:0045671	negative regulation of osteoclast differentiation	6/486	33/18112	0.000216461	0.008852	0.00709623	113937/292594/84397/83727/315579/24241	6
BP	GO:0099558	maintenance of synapse structure	6/486	33/18112	0.000216461	0.008852	0.00709623	81717/361824/500105/363058/25531/81821	6
BP	GO:0007596	blood coagulation	15/486	192/18112	0.000218406	0.008852	0.00709623	24232/362248/25661/24653/64519/309186/64467/24617/295703/24498/29499/361288/315579/171048/25265	15
BP	GO:0009914	hormone transport	24/486	400/18112	0.000219471	0.008852	0.00709623	84046/24484/29151/170896/24230/24498/24166/83727/24675/24806/65152/58950/24258/85264/112400/24877/81024/252857/25736/25196/25265/303382/24602/24247	24
BP	GO:0007188	adenylate cyclase-modulating G protein-coupled receptor signaling pathway	17/486	236/18112	0.000225891	0.00903563	0.00724344	58965/170896/24695/24166/289180/171519/24258/83633/50664/291713/252857/25265/25323/24241/24247/24417/24476	17
BP	GO:0070509	calcium ion import	10/486	95/18112	0.000231925	0.0090841	0.0072823	29151/24617/84550/365567/364601/83810/309014/24247/114862/24476	10
BP	GO:0032964	collagen biosynthetic process	8/486	62/18112	0.000240468	0.0090841	0.0072823	25661/59107/29221/29151/24617/59086/24498/24401	8
BP	GO:0045778	positive regulation of ossification	8/486	62/18112	0.000240468	0.0090841	0.0072823	85272/84046/24653/59086/315716/24806/81733/24241	8
BP	GO:0031346	positive regulation of cell projection organization	26/486	453/18112	0.000244347	0.0090841	0.0072823	27064/85272/25661/312299/24498/302965/24166/306400/171500/24596/29477/81730/79253/311349/58950/84409/59109/112400/295365/29722/291713/24245/171574/432358/306790/117243	26
BP	GO:0046683	response to organophosphorus	15/486	194/18112	0.00024445	0.0090841	0.0072823	114856/64519/25620/54319/25216/24795/24617/81718/60395/29711/83810/727679/25196/25041/25698	15
BP	GO:0009642	response to light intensity	5/486	22/18112	0.000245862	0.0090841	0.0072823	84550/83579/500105/246153/25327	5
BP	GO:0032693	negative regulation of interleukin-10 production	5/486	22/18112	0.000245862	0.0090841	0.0072823	292594/289211/690899/361537/313974	5
BP	GO:0046716	muscle cell cellular homeostasis	5/486	22/18112	0.000245862	0.0090841	0.0072823	59086/24498/361368/24675/65152	5
BP	GO:0071214	cellular response to abiotic stimulus	25/486	428/18112	0.000245871	0.0090841	0.0072823	27064/83807/59107/24577/171045/25112/24617/84604/81686/24230/361430/59086/84550/83579/365567/29639/84480/24211/24401/83810/360916/116489/79123/25105/24602	25
BP	GO:0104004	cellular response to environmental stimulus	25/486	428/18112	0.000245871	0.0090841	0.0072823	27064/83807/59107/24577/171045/25112/24617/84604/81686/24230/361430/59086/84550/83579/365567/29639/84480/24211/24401/83810/360916/116489/79123/25105/24602	25
BP	GO:0007599	hemostasis	15/486	195/18112	0.000258449	0.00947646	0.00759683	24232/362248/25661/24653/64519/309186/64467/24617/295703/24498/29499/361288/315579/171048/25265	15
BP	GO:0007517	muscle organ development	22/486	356/18112	0.00026466	0.00963123	0.00772091	27064/84046/29279/83807/307403/309122/24577/25389/59086/24498/29499/361368/24596/500105/24183/84008/65248/29737/83514/112400/25495/25698	22
BP	GO:0045453	bone resorption	9/486	80/18112	0.000286766	0.0103573	0.00830298	29175/307403/84604/50654/24498/315579/54231/24241/24476	9
BP	GO:0030316	osteoclast differentiation	11/486	116/18112	0.000288893	0.0103573	0.00830298	113937/292594/25236/84397/307403/361537/59086/83727/315579/54231/24241	11
BP	GO:0006887	exocytosis	24/486	408/18112	0.000293736	0.0104536	0.00838013	81717/25216/24675/79433/303222/83589/26989/314622/170824/25731/24258/25531/312166/24877/83834/252857/60377/171058/25736/25101/25265/24602/114862/24417	24
BP	GO:0002820	negative regulation of adaptive immune response	8/486	64/18112	0.000300416	0.0105575	0.00846346	292594/289211/690899/29221/24699/24675/289335/64036	8
BP	GO:0050817	coagulation	15/486	198/18112	0.000304674	0.0105575	0.00846346	24232/362248/25661/24653/64519/309186/64467/24617/295703/24498/29499/361288/315579/171048/25265	15
BP	GO:0060560	developmental growth involved in morphogenesis	19/486	288/18112	0.000304965	0.0105575	0.00846346	361945/25661/307403/353252/24695/59086/302965/29499/93667/29477/84488/171572/688272/363058/25731/112400/83834/117038/306790	19
BP	GO:0050961	detection of temperature stimulus involved in sensory perception	5/486	23/18112	0.000307276	0.0105575	0.00846346	24806/286920/59109/83810/24241	5
BP	GO:0051048	negative regulation of secretion	16/486	220/18112	0.000307785	0.0105575	0.00846346	64519/24484/29151/170896/24230/24498/83727/314622/58950/24258/112400/24877/25736/79123/25196/25265	16
BP	GO:0002920	regulation of humoral immune response	7/486	49/18112	0.000310609	0.0105575	0.00846346	24232/289211/24699/295703/29185/289335/64036	7
BP	GO:0034599	cellular response to oxidative stress	21/486	336/18112	0.000311927	0.0105575	0.00846346	54237/29221/312299/171045/24617/81686/24618/246240/24312/29244/24498/171500/24596/29477/117520/84480/65248/288753/306722/117038/24916	21
BP	GO:1901215	negative regulation of neuron death	18/486	266/18112	0.000321413	0.010803	0.00866029	113959/29151/113955/24618/290655/24498/29499/29707/24596/117520/300186/24806/24258/113893/59109/29739/300652/117038	18
BP	GO:0071347	cellular response to interleukin-1	12/486	137/18112	0.000325558	0.0108669	0.00871149	27064/25661/24577/171164/171045/24795/24617/25464/81686/24498/287910/25196	12
BP	GO:0046887	positive regulation of hormone secretion	14/486	179/18112	0.000347083	0.0114608	0.00918759	84046/29151/24498/24166/24675/24806/65152/85264/24877/25196/25265/303382/24602/24247	14
BP	GO:0021782	glial cell development	12/486	138/18112	0.000348087	0.0114608	0.00918759	113959/84046/298566/307403/59086/29499/500105/84008/112400/57033/297453/117038	12
BP	GO:0019932	second-messenger-mediated signaling	21/486	339/18112	0.000351171	0.0114646	0.00919065	64455/25620/29151/494021/24699/24166/24675/553106/29477/65248/140666/688272/58950/24258/112400/246153/291713/24877/252857/25105/24602	21
BP	GO:0070839	metal ion export	7/486	50/18112	0.00035294	0.0114646	0.00919065	84604/24213/24211/25736/65195/24602/29599	7
BP	GO:0072593	reactive oxygen species metabolic process	17/486	246/18112	0.000366993	0.0118416	0.00949287	361537/171045/25112/66021/246240/24230/24312/59086/29244/306840/24596/29477/84480/301458/84356/192268/117038	17
BP	GO:0007584	response to nutrient	20/486	317/18112	0.000381606	0.0122316	0.00980551	361945/85272/24653/59107/25056/29221/24795/84604/24268/66021/24230/59086/29477/362029/58950/29711/29739/117243/24247/25698	20
BP	GO:0001818	negative regulation of cytokine production	19/486	295/18112	0.000411269	0.0127779	0.0102435	292594/25661/289211/690899/29221/312299/54319/361537/24699/113955/24230/59086/315716/362431/24498/313974/84356/25196/116777	19
BP	GO:0046717	acid secretion	8/486	67/18112	0.000412736	0.0127779	0.0102435	29151/24577/83589/65248/83810/29559/24247/24417	8
BP	GO:0009134	nucleoside diphosphate catabolic process	4/486	14/18112	0.000413785	0.0127779	0.0102435	64519/64467/58813/361063	4
BP	GO:0032222	regulation of synaptic transmission, cholinergic	4/486	14/18112	0.000413785	0.0127779	0.0102435	24596/24806/24245/25101	4
BP	GO:0030728	ovulation	6/486	37/18112	0.000414955	0.0127779	0.0102435	84397/24653/24577/81686/192251/25196	6
BP	GO:0062149	detection of stimulus involved in sensory perception of pain	6/486	37/18112	0.000414955	0.0127779	0.0102435	24806/286920/59109/81574/83810/24241	6
BP	GO:0071692	protein localization to extracellular region	24/486	418/18112	0.000417131	0.0127779	0.0102435	27064/59107/54319/59086/24498/24166/83727/24675/79433/360738/65152/58950/170824/24258/85264/25531/29722/24877/81024/252857/171058/25736/25196/24247	24
BP	GO:0050670	regulation of lymphocyte proliferation	17/486	249/18112	0.000421996	0.0128457	0.0102978	292594/84046/289211/690899/29221/361537/24699/113955/246240/59086/315716/24498/29499/25368/24806/64036/680006	17
BP	GO:0051924	regulation of calcium ion transport	19/486	296/18112	0.000428819	0.0129718	0.0103988	29151/24617/25464/24230/59086/24215/81869/83579/60395/314622/315579/58950/29480/50664/24602/24241/309014/24247/24476	19
BP	GO:0007411	axon guidance	17/486	250/18112	0.000441846	0.0132293	0.0106053	85272/307403/29499/79433/306400/24596/252880/57233/84409/59109/116658/303311/29722/305571/25495/311134/306790	17
BP	GO:0007611	learning or memory	21/486	345/18112	0.000442799	0.0132293	0.0106053	29151/29707/84550/29477/500105/84488/24213/140666/24806/29737/59109/112400/309510/305268/29722/116489/83632/25495/79123/432358/24417	21
BP	GO:0032965	regulation of collagen biosynthetic process	7/486	52/18112	0.000451431	0.0134044	0.0107457	25661/59107/29151/24617/59086/24498/24401	7
BP	GO:0014009	glial cell proliferation	8/486	68/18112	0.000456977	0.0134864	0.0108114	84046/307403/24577/24230/24498/24166/500105/112400	8
BP	GO:0030574	collagen catabolic process	6/486	38/18112	0.000481725	0.0140455	0.0112596	29175/690899/171045/65205/81686/50654	6
BP	GO:0033198	response to ATP	6/486	38/18112	0.000481725	0.0140455	0.0112596	64519/24617/60395/83810/727679/25041	6
BP	GO:0051881	regulation of mitochondrial membrane potential	9/486	86/18112	0.000493624	0.0142428	0.0114178	24577/24230/24596/29477/84480/301458/29739/24401/83810	9
BP	GO:0002443	leukocyte mediated immunity	24/486	423/18112	0.00049438	0.0142428	0.0114178	113937/24232/292594/289211/690899/298566/294269/29221/361537/29687/24699/25464/360468/295703/362634/246240/59086/24498/24675/363058/24258/289335/64036/24602	24
BP	GO:0045124	regulation of bone resorption	7/486	53/18112	0.000508284	0.0145568	0.0116695	307403/84604/24498/315579/54231/24241/24476	7
BP	GO:0003012	muscle system process	25/486	451/18112	0.000534531	0.0152009	0.0121858	29151/312299/494021/84604/60395/84488/24213/25368/58950/29480/24258/24211/81574/308709/83810/29722/29571/25101/65195/25265/25323/25105/24602/24241/114862	25
BP	GO:0043954	cellular component maintenance	9/486	87/18112	0.00053776	0.0152009	0.0121858	81717/289211/307403/361824/500105/84008/363058/25531/81821	9
BP	GO:0002706	regulation of lymphocyte mediated immunity	15/486	209/18112	0.000540197	0.0152009	0.0121858	113937/24232/292594/289211/690899/294269/29221/24699/246240/59086/24498/24675/363058/289335/64036	15
BP	GO:0045989	positive regulation of striated muscle contraction	4/486	15/18112	0.000552342	0.015364	0.0123166	29151/24258/24211/24602	4
BP	GO:1903818	positive regulation of voltage-gated potassium channel activity	4/486	15/18112	0.000552342	0.015364	0.0123166	295365/246153/25327/24602	4
BP	GO:0042475	odontogenesis of dentin-containing tooth	10/486	106/18112	0.000562857	0.015567	0.0124793	85272/24617/59086/29499/24596/54231/50664/29228/29571/292949	10
BP	GO:2001257	regulation of cation channel activity	14/486	188/18112	0.000568924	0.0156454	0.0125422	50654/81869/83579/84488/314622/306722/58950/29737/295365/246153/25327/117023/24602/171039	14
BP	GO:0009408	response to heat	12/486	146/18112	0.000580599	0.0158763	0.0127272	291234/24653/309499/60350/24498/78956/29477/500105/24797/286920/83810/24241	12
BP	GO:0071772	response to BMP	14/486	189/18112	0.000599731	0.0162162	0.0129998	25236/85272/25661/84397/84046/690899/59086/83727/303689/300652/65195/25495/79210/117140	14
BP	GO:0071773	cellular response to BMP stimulus	14/486	189/18112	0.000599731	0.0162162	0.0129998	25236/85272/25661/84397/84046/690899/59086/83727/303689/300652/65195/25495/79210/117140	14
BP	GO:0043200	response to amino acid	17/486	257/18112	0.000604736	0.0162607	0.0130354	64519/29221/171045/25464/81686/24618/66021/24498/81718/24797/29739/295365/25456/309510/24245/25736/25698	17
BP	GO:0002460	adaptive immune response based on somatic recombination of immune receptors built from immunoglobulin superfamily domains	20/486	330/18112	0.000634699	0.0169015	0.0135491	24232/292594/289211/690899/298566/24653/294269/29221/29687/24699/25464/360468/295703/362634/246240/59086/24498/24675/289335/64036	20
BP	GO:0050805	negative regulation of synaptic transmission	9/486	89/18112	0.000635754	0.0169015	0.0135491	84550/171500/29477/500105/252857/25736/79123/29559/24417	9
BP	GO:0043268	positive regulation of potassium ion transport	7/486	55/18112	0.000639043	0.0169015	0.0135491	54296/295365/246153/25327/29272/24602/306811	7
BP	GO:0050767	regulation of neurogenesis	25/486	457/18112	0.000647078	0.017021	0.0136449	85272/25661/84046/24577/312299/24230/59086/24498/302965/29499/24166/171500/29477/84488/501625/84409/112400/295365/300652/24245/25495/117038/24916/306790/315691	25
BP	GO:0017157	regulation of exocytosis	17/486	259/18112	0.000659826	0.0172625	0.0138385	25216/83589/26989/314622/25731/25531/312166/24877/83834/252857/171058/25736/25101/25265/24602/114862/24417	17
BP	GO:0002710	negative regulation of T cell mediated immunity	5/486	27/18112	0.000674818	0.0175598	0.0140768	292594/690899/29221/24699/24675	5
BP	GO:0006836	neurotransmitter transport	17/486	260/18112	0.000688948	0.0178316	0.0142948	81717/29464/83589/24949/613226/26989/25731/25531/312166/83834/81024/60377/25101/79123/25265/171039/24417	17
BP	GO:0060249	anatomical structure homeostasis	21/486	358/18112	0.000715382	0.0184173	0.0147643	29175/24653/307403/64355/84604/24695/59086/50654/24498/24215/361368/24675/65248/315579/65152/54231/25265/24241/29599/24476/116777	21
BP	GO:0060537	muscle tissue development	26/486	487/18112	0.000728043	0.0186441	0.0149461	27064/85272/84046/54237/29279/83807/307403/309122/24577/25389/84604/59086/29499/79433/24596/500105/84008/65248/29737/83514/29480/112400/25495/25444/25105/24602	26
BP	GO:0019884	antigen processing and presentation of exogenous antigen	6/486	41/18112	0.000733116	0.0186752	0.014971	289211/294269/290644/362431/50654/301388	6
BP	GO:0034614	cellular response to reactive oxygen species	14/486	193/18112	0.000737514	0.0186888	0.014982	54237/29221/312299/24617/81686/24618/246240/24312/29244/24498/84480/65248/117038/24916	14
BP	GO:0009306	protein secretion	23/486	410/18112	0.000750565	0.0187764	0.0150521	27064/54319/59086/24498/24166/83727/24675/79433/360738/65152/58950/170824/24258/85264/25531/29722/24877/81024/252857/171058/25736/25196/24247	23
BP	GO:0001657	ureteric bud development	10/486	110/18112	0.000753647	0.0187764	0.0150521	114122/25236/85272/24577/25216/290655/59086/29499/84409/25495	10
BP	GO:0048588	developmental cell growth	18/486	286/18112	0.000757211	0.0187764	0.0150521	361945/25661/307403/84604/302965/93667/29477/84488/171572/688272/29480/25731/112400/83834/117038/306790/25105/24602	18
BP	GO:0098657	import into cell	16/486	239/18112	0.000762673	0.0187764	0.0150521	292657/29464/246239/29221/84550/24213/79131/170824/29480/24211/311866/83810/65195/117243/306811/24476	16
BP	GO:0002456	T cell mediated immunity	11/486	130/18112	0.000764245	0.0187764	0.0150521	292594/690899/294269/29221/24699/25464/360468/246240/24498/24675/64036	11
BP	GO:0032414	positive regulation of ion transmembrane transporter activity	11/486	130/18112	0.000764245	0.0187764	0.0150521	308113/50654/81869/295365/58963/246153/25327/288689/24602/306811/79246	11
BP	GO:0007626	locomotory behavior	17/486	263/18112	0.000783014	0.0191403	0.0153439	24215/24675/29477/83589/500105/117520/24213/304900/140666/112400/81574/50664/57033/25456/305268/25101/432358	17
BP	GO:0035592	establishment of protein localization to extracellular region	23/486	412/18112	0.000801527	0.0194769	0.0156137	27064/54319/59086/24498/24166/83727/24675/79433/360738/65152/58950/170824/24258/85264/25531/29722/24877/81024/252857/171058/25736/25196/24247	23
BP	GO:0072163	mesonephric epithelium development	10/486	111/18112	0.000808854	0.0194769	0.0156137	114122/25236/85272/24577/25216/290655/59086/29499/84409/25495	10
BP	GO:0072164	mesonephric tubule development	10/486	111/18112	0.000808854	0.0194769	0.0156137	114122/25236/85272/24577/25216/290655/59086/29499/84409/25495	10
BP	GO:0046849	bone remodeling	10/486	112/18112	0.000867343	0.0207594	0.0166418	29175/307403/84604/59086/50654/24498/315579/54231/24241/24476	10
BP	GO:0048771	tissue remodeling	15/486	219/18112	0.000874852	0.0207594	0.0166418	29175/64195/307403/29221/84604/113955/24268/81686/59086/50654/24498/315579/54231/24241/24476	15
BP	GO:0031646	positive regulation of nervous system process	7/486	58/18112	0.000883745	0.0207594	0.0166418	24498/24596/500105/24806/112400/252857/499349	7
BP	GO:0051926	negative regulation of calcium ion transport	8/486	75/18112	0.000885974	0.0207594	0.0166418	25464/59086/81869/83579/314622/58950/50664/24241	8
BP	GO:0055117	regulation of cardiac muscle contraction	8/486	75/18112	0.000885974	0.0207594	0.0166418	29151/84488/58950/24258/24211/29571/24602/114862	8
BP	GO:0045471	response to ethanol	17/486	266/18112	0.000887849	0.0207594	0.0166418	24886/54237/24577/25464/25383/84604/60350/66021/29499/24166/54296/81718/65248/29480/59109/246153/79246	17
BP	GO:0007612	learning	14/486	197/18112	0.000901173	0.0208693	0.0167299	29151/29707/84550/500105/84488/24213/24806/305268/29722/83632/25495/79123/432358/24417	14
BP	GO:0031644	regulation of nervous system process	14/486	197/18112	0.000901173	0.0208693	0.0167299	50654/24498/24596/81005/500105/24806/29480/112400/29701/286923/252857/266777/24241/499349	14
BP	GO:0030902	hindbrain development	15/486	221/18112	0.000959491	0.022114	0.0177277	113959/360243/85272/289211/312299/29499/24215/79433/500105/300186/24183/311349/361672/25327/25495	15
BP	GO:0060048	cardiac muscle contraction	11/486	134/18112	0.000982535	0.0225378	0.0180675	29151/84488/24213/58950/24258/24211/81574/29571/65195/24602/114862	11
BP	GO:0034767	positive regulation of ion transmembrane transport	14/486	199/18112	0.000993854	0.0226039	0.0181205	308113/50654/81869/54296/295365/58963/246153/25327/288689/29272/24602/306811/79246/24476	14
BP	GO:0002027	regulation of heart rate	10/486	114/18112	0.000994759	0.0226039	0.0181205	29244/24806/58950/29480/83810/29571/65195/116745/24602/24241	10
BP	GO:0099173	postsynapse organization	15/486	222/18112	0.00100434	0.022715	0.0182096	289211/79433/171500/303222/81005/500105/84008/363058/25456/252857/24245/266777/171574/171039/81821	15
BP	GO:0001823	mesonephros development	10/486	115/18112	0.00106399	0.0239521	0.0192013	114122/25236/85272/24577/25216/290655/59086/29499/84409/25495	10
BP	GO:0060251	regulation of glial cell proliferation	6/486	44/18112	0.00107554	0.0241001	0.0193199	84046/24577/24230/24498/24166/112400	6
BP	GO:0009268	response to pH	7/486	60/18112	0.00108418	0.0241817	0.0193853	50654/24797/54231/286920/83810/116489/79123	7
BP	GO:0099003	vesicle-mediated transport in synapse	17/486	271/18112	0.00108919	0.0241819	0.0193855	81717/24675/83589/24949/26989/25731/25531/113893/112400/312166/83834/252857/25101/192349/171574/25265/24417	17
BP	GO:2001235	positive regulation of apoptotic signaling pathway	12/486	157/18112	0.00110225	0.0243602	0.0195284	117540/315648/24577/25389/24699/246240/302965/24596/289388/170824/24245/25196	12
BP	GO:0034104	negative regulation of tissue remodeling	5/486	30/18112	0.00111493	0.0245285	0.0196634	84604/24498/315579/24241/24476	5
BP	GO:0007269	neurotransmitter secretion	14/486	202/18112	0.00114783	0.02495	0.0200013	81717/83589/24949/26989/25731/25531/312166/83834/60377/25101/79123/25265/171039/24417	14
BP	GO:0099643	signal release from synapse	14/486	202/18112	0.00114783	0.02495	0.0200013	81717/83589/24949/26989/25731/25531/312166/83834/60377/25101/79123/25265/171039/24417	14
BP	GO:0002921	negative regulation of humoral immune response	4/486	18/18112	0.00116159	0.02495	0.0200013	289211/295703/289335/64036	4
BP	GO:0021681	cerebellar granular layer development	4/486	18/18112	0.00116159	0.02495	0.0200013	360243/24215/311349/361672	4
BP	GO:0042476	odontogenesis	12/486	158/18112	0.00116459	0.02495	0.0200013	85272/25216/24617/59086/29499/24596/54231/112400/50664/29228/29571/292949	12
BP	GO:0050769	positive regulation of neurogenesis	18/486	297/18112	0.00116502	0.02495	0.0200013	25661/84046/24577/24230/59086/24498/302965/29499/171500/29477/501625/84409/112400/295365/24245/25495/24916/306790	18
BP	GO:0006959	humoral immune response	16/486	249/18112	0.00117644	0.025006	0.0200461	24232/289211/298566/306748/29687/54249/24699/84604/295703/24618/362634/29185/24806/289335/64036/25105	16
BP	GO:1902105	regulation of leukocyte differentiation	19/486	322/18112	0.00117797	0.025006	0.0200461	113937/292594/84397/690899/294269/307403/25056/24577/361537/24699/362634/59086/24498/29499/83727/315579/54231/288689/24241	19
BP	GO:0002253	activation of immune response	18/486	298/18112	0.00120997	0.0255325	0.0204682	24232/113959/292594/117540/289211/298566/291813/54319/361537/29687/54249/24699/295703/362634/315716/289335/64036/81821	18
BP	GO:0045823	positive regulation of heart contraction	6/486	45/18112	0.00121332	0.0255325	0.0204682	29151/29244/29480/24258/24211/24602	6
BP	GO:0042130	negative regulation of T cell proliferation	8/486	79/18112	0.00124831	0.0260768	0.0209045	292594/690899/29221/113955/59086/315716/29499/680006	8
BP	GO:0032411	positive regulation of transporter activity	11/486	138/18112	0.00124996	0.0260768	0.0209045	308113/50654/81869/295365/58963/246153/25327/288689/24602/306811/79246	11
BP	GO:0016358	dendrite development	19/486	324/18112	0.00126598	0.0262977	0.0210816	85272/289211/312299/171500/24596/303222/500105/361672/112400/309510/305268/252857/24245/25101/117038/171574/432358/306790/266711	19
BP	GO:0050777	negative regulation of immune response	13/486	182/18112	0.00129711	0.0268291	0.0215076	113937/292594/289211/690899/29221/54410/24699/295703/59086/24166/24675/289335/64036	13
BP	GO:0007159	leukocyte cell-cell adhesion	21/486	376/18112	0.00132542	0.027298	0.0218836	292594/85272/690899/294269/309186/29221/54319/24699/25464/113955/59086/315716/58813/24498/29499/25368/64036/680006/306790/24241/25698	21
BP	GO:1990090	cellular response to nerve growth factor stimulus	8/486	80/18112	0.00135515	0.0277921	0.0222796	24617/116659/24806/59109/83810/252857/432358/24241	8
BP	GO:0010996	response to auditory stimulus	6/486	46/18112	0.00136421	0.0278598	0.0223339	64519/29151/64467/24498/500105/25327	6
BP	GO:0001906	cell killing	15/486	229/18112	0.00137066	0.0278739	0.0223452	113937/24232/294269/306748/29221/361537/24699/360468/84604/246240/24675/24806/363058/64036/25105	15
BP	GO:0032147	activation of protein kinase activity	11/486	140/18112	0.00140458	0.0284047	0.0227707	29151/360468/246240/83727/84488/112400/60341/25101/117038/287805/24241	11
BP	GO:0032943	mononuclear cell proliferation	19/486	327/18112	0.0014085	0.0284047	0.0227707	292594/84046/289211/690899/307403/29221/361537/24699/113955/246240/59086/315716/24498/29499/25368/24806/58950/64036/680006	19
BP	GO:0045837	negative regulation of membrane potential	4/486	19/18112	0.00144041	0.0288565	0.0231329	24498/29477/84480/83810	4
BP	GO:0070661	leukocyte proliferation	20/486	353/18112	0.00144359	0.0288565	0.0231329	292594/84046/289211/690899/307403/29221/361537/54410/24699/113955/246240/59086/315716/24498/29499/25368/24806/58950/64036/680006	20
BP	GO:0002822	regulation of adaptive immune response based on somatic recombination of immune receptors built from immunoglobulin superfamily domains	14/486	207/18112	0.00144879	0.0288565	0.0231329	24232/292594/289211/690899/24653/294269/29221/24699/246240/59086/24498/24675/289335/64036	14
BP	GO:1904063	negative regulation of cation transmembrane transport	9/486	100/18112	0.00146915	0.0291421	0.0233618	84604/59086/81869/83579/29639/314622/58950/29737/29480	9
BP	GO:0050773	regulation of dendrite development	11/486	141/18112	0.00148757	0.0293871	0.0235582	85272/312299/171500/361672/252857/24245/25101/117038/432358/306790/266711	11
BP	GO:0003085	negative regulation of systemic arterial blood pressure	5/486	32/18112	0.00150765	0.0296627	0.0237792	24806/83810/25105/24602/24241	5
BP	GO:0032103	positive regulation of response to external stimulus	24/486	459/18112	0.001522	0.0298238	0.0239084	24232/113959/117540/25661/24653/306748/307403/29221/361537/24617/81686/59086/50654/24498/29499/83727/24806/58950/363058/112400/311866/24765/24602/24247	24
BP	GO:0002703	regulation of leukocyte mediated immunity	17/486	280/18112	0.00154983	0.0301981	0.0242084	113937/24232/292594/289211/690899/294269/29221/361537/24699/246240/59086/24498/24675/363058/289335/64036/24602	17
BP	GO:2001233	regulation of apoptotic signaling pathway	22/486	407/18112	0.00155853	0.0301981	0.0242084	117540/83807/315648/50692/24577/25389/24617/24699/24962/25464/246240/302965/24596/289388/306722/170824/112400/29739/24245/25495/25196/24765	22
BP	GO:0051952	regulation of amine transport	10/486	121/18112	0.00156691	0.0301981	0.0242084	64519/29221/29480/25731/24258/25531/25736/25101/29559/25265	10
BP	GO:0071385	cellular response to glucocorticoid stimulus	10/486	121/18112	0.00156691	0.0301981	0.0242084	116685/29221/170896/24795/24617/25464/59086/24498/24166/25698	10
BP	GO:0002709	regulation of T cell mediated immunity	9/486	101/18112	0.00157547	0.0301981	0.0242084	292594/690899/294269/29221/24699/246240/24498/24675/64036	9
BP	GO:0014015	positive regulation of gliogenesis	8/486	82/18112	0.00159058	0.0301981	0.0242084	24577/24230/59086/24498/29499/112400/25495/24916	8
BP	GO:0046850	regulation of bone remodeling	7/486	64/18112	0.00159102	0.0301981	0.0242084	307403/84604/24498/315579/54231/24241/24476	7
BP	GO:0051932	synaptic transmission, GABAergic	7/486	64/18112	0.00159102	0.0301981	0.0242084	312299/29707/500105/24806/54231/29559/24417	7
BP	GO:0035296	regulation of tube diameter	13/486	187/18112	0.00165559	0.0311792	0.0249949	24886/29151/25464/81686/29244/24166/24258/29739/25265/25323/24602/24241/24247	13
BP	GO:0097746	blood vessel diameter maintenance	13/486	187/18112	0.00165559	0.0311792	0.0249949	24886/29151/25464/81686/29244/24166/24258/29739/25265/25323/24602/24241/24247	13
BP	GO:0051962	positive regulation of nervous system development	20/486	358/18112	0.00170506	0.0319865	0.025642	25661/84046/24577/24230/59086/24498/302965/29499/171500/29477/300186/501625/84409/59109/112400/295365/24245/25495/24916/306790	20
BP	GO:0035150	regulation of tube size	13/486	188/18112	0.00173631	0.0321923	0.0258071	24886/29151/25464/81686/29244/24166/24258/29739/25265/25323/24602/24241/24247	13
BP	GO:0048641	regulation of skeletal muscle tissue development	5/486	33/18112	0.00173822	0.0321923	0.0258071	83807/59086/29499/65248/83514	5
BP	GO:0042692	muscle cell differentiation	23/486	437/18112	0.00173998	0.0321923	0.0258071	24232/54237/360626/362332/309499/312299/25216/54410/54249/24962/84604/361430/59086/29499/79433/500105/84008/29480/112400/25444/25105/24602/306600	23
BP	GO:0140115	export across plasma membrane	7/486	65/18112	0.00174264	0.0321923	0.0258071	84604/24213/24211/25736/65195/24602/29599	7
BP	GO:0002923	regulation of humoral immune response mediated by circulating immunoglobulin	4/486	20/18112	0.00176269	0.0323159	0.0259061	289211/24699/289335/64036	4
BP	GO:0005980	glycogen catabolic process	4/486	20/18112	0.00176269	0.0323159	0.0259061	689995/362029/65152/25739	4
BP	GO:0034612	response to tumor necrosis factor	17/486	284/18112	0.00180204	0.0329128	0.0263846	27064/361945/64519/83807/171164/171045/64467/25464/84604/60350/24618/29244/24498/287910/83810/24241/25698	17
BP	GO:0042129	regulation of T cell proliferation	13/486	189/18112	0.00182027	0.0331206	0.0265512	292594/690899/29221/24699/113955/246240/59086/315716/24498/29499/25368/64036/680006	13
BP	GO:0001666	response to hypoxia	23/486	439/18112	0.0018448	0.0334414	0.0268084	27064/361945/360962/24484/24577/170896/171045/24617/25464/81686/66021/59086/29499/84480/85256/65248/363442/25495/117038/25105/24602/117243/24247	23
BP	GO:0046165	alcohol biosynthetic process	11/486	145/18112	0.00186071	0.0336039	0.0269387	308451/24312/29244/171548/29580/65248/85264/24401/25265/290651/114862	11
BP	GO:1903524	positive regulation of blood circulation	6/486	49/18112	0.00190356	0.0338557	0.0271405	29151/29244/29480/24258/24211/24602	6
BP	GO:0050982	detection of mechanical stimulus	7/486	66/18112	0.00190526	0.0338557	0.0271405	24577/361430/24215/286920/59109/81574/116489	7
BP	GO:1901016	regulation of potassium ion transmembrane transporter activity	7/486	66/18112	0.00190526	0.0338557	0.0271405	29639/29737/295365/246153/25327/117023/24602	7
BP	GO:0098739	import across plasma membrane	13/486	190/18112	0.00190754	0.0338557	0.0271405	292657/29464/246239/29221/84550/24213/29480/24211/83810/65195/117243/306811/24476	13
BP	GO:0090087	regulation of peptide transport	16/486	261/18112	0.00190963	0.0338557	0.0271405	29151/24498/24166/83727/24675/65152/58950/54231/24258/85264/24877/81024/25736/25196/303382/24247	16
BP	GO:0030510	regulation of BMP signaling pathway	9/486	104/18112	0.00193196	0.0341265	0.0273576	25236/84397/84046/690899/83727/303689/300652/25495/79210	9
BP	GO:0045055	regulated exocytosis	17/486	286/18112	0.00194057	0.034154	0.0273796	81717/24675/83589/26989/314622/25731/24258/25531/312166/83834/252857/25736/25101/25265/24602/114862/24417	17
BP	GO:0015833	peptide transport	19/486	337/18112	0.00198614	0.0346005	0.0277376	246239/29151/24498/24166/83727/24675/65152/58950/54231/24258/85264/83810/24877/81024/252857/25736/25196/303382/24247	19
BP	GO:0010447	response to acidic pH	5/486	34/18112	0.00199361	0.0346005	0.0277376	50654/24797/286920/83810/79123	5
BP	GO:0051150	regulation of smooth muscle cell differentiation	5/486	34/18112	0.00199361	0.0346005	0.0277376	54410/24962/59086/29499/25444	5
BP	GO:0060452	positive regulation of cardiac muscle contraction	3/486	10/18112	0.00200168	0.0346005	0.0277376	29151/24258/24602	3
BP	GO:0060513	prostatic bud formation	3/486	10/18112	0.00200168	0.0346005	0.0277376	85272/29499/25495	3
BP	GO:0010001	glial cell differentiation	17/486	287/18112	0.00201312	0.0346743	0.0277967	113959/84046/298566/307403/59086/29499/500105/84008/84480/102552664/112400/57033/297453/25495/117038/24916/315691	17
BP	GO:0070265	necrotic cell death	7/486	67/18112	0.00207938	0.0355779	0.0285211	29464/83807/29151/246240/24230/84480/117038	7
BP	GO:0002573	myeloid leukocyte differentiation	15/486	239/18112	0.00208365	0.0355779	0.0285211	113937/292594/25236/84397/307403/25056/24577/361537/362634/59086/83727/315579/54231/288689/24241	15
BP	GO:0008306	associative learning	10/486	126/18112	0.00211998	0.0355779	0.0285211	29151/29707/500105/24213/24806/29722/83632/25495/79123/432358	10
BP	GO:0015837	amine transport	10/486	126/18112	0.00211998	0.0355779	0.0285211	64519/29221/29480/25731/24258/25531/25736/25101/29559/25265	10
BP	GO:0009251	glucan catabolic process	4/486	21/18112	0.00213173	0.0355779	0.0285211	689995/362029/65152/25739	4
BP	GO:0010523	negative regulation of calcium ion transport into cytosol	4/486	21/18112	0.00213173	0.0355779	0.0285211	59086/81869/58950/24241	4
BP	GO:0019886	antigen processing and presentation of exogenous peptide antigen via MHC class II	4/486	21/18112	0.00213173	0.0355779	0.0285211	289211/294269/290644/50654	4
BP	GO:0044247	cellular polysaccharide catabolic process	4/486	21/18112	0.00213173	0.0355779	0.0285211	689995/362029/65152/25739	4
BP	GO:0051900	regulation of mitochondrial depolarization	4/486	21/18112	0.00213173	0.0355779	0.0285211	24230/24596/29739/24401	4
BP	GO:0030198	extracellular matrix organization	18/486	314/18112	0.00215614	0.0357708	0.0286757	304960/361945/25661/305494/24477/171045/85251/65205/81686/116487/59086/50654/24498/364755/315728/295382/29722/282583	18
BP	GO:0006112	energy reserve metabolic process	8/486	86/18112	0.00215807	0.0357708	0.0286757	689995/362029/58977/65152/81675/25739/117038/192361	8
BP	GO:0019935	cyclic-nucleotide-mediated signaling	9/486	106/18112	0.00220343	0.036398	0.0291786	25620/29151/24166/688272/24258/246153/252857/25105/24602	9
BP	GO:0043062	extracellular structure organization	18/486	315/18112	0.00223168	0.0364909	0.0292531	304960/361945/25661/305494/24477/171045/85251/65205/81686/116487/59086/50654/24498/364755/315728/295382/29722/282583	18
BP	GO:0050708	regulation of protein secretion	18/486	315/18112	0.00223168	0.0364909	0.0292531	27064/54319/59086/24498/83727/24675/79433/65152/58950/24258/85264/29722/24877/81024/252857/25736/25196/24247	18
BP	GO:0071222	cellular response to lipopolysaccharide	18/486	315/18112	0.00223168	0.0364909	0.0292531	27064/117540/25661/289211/64519/29221/171164/64467/24617/25464/84604/60350/170819/24230/59086/24498/64036/25698	18
BP	GO:0070555	response to interleukin-1	12/486	171/18112	0.00227803	0.0371235	0.0297602	27064/25661/24577/171164/171045/24795/24617/25464/81686/24498/287910/25196	12
BP	GO:0045229	external encapsulating structure organization	18/486	316/18112	0.00230942	0.0375087	0.030069	304960/361945/25661/305494/24477/171045/85251/65205/81686/116487/59086/50654/24498/364755/315728/295382/29722/282583	18
BP	GO:0007492	endoderm development	8/486	87/18112	0.00232215	0.0375894	0.0301336	114856/25661/25683/81686/301012/24695/59086/25495	8
BP	GO:0099504	synaptic vesicle cycle	15/486	243/18112	0.00244441	0.0393599	0.031553	81717/24675/83589/24949/26989/25731/25531/113893/312166/83834/252857/25101/171574/25265/24417	15
BP	GO:0048639	positive regulation of developmental growth	14/486	219/18112	0.00244779	0.0393599	0.031553	24232/25661/54237/83807/54319/24617/84604/302965/29477/688272/25731/112400/25444/306790	14
BP	GO:0045776	negative regulation of blood pressure	7/486	69/18112	0.00246434	0.0394947	0.031661	29151/29244/24806/83810/25105/24602/24241	7
BP	GO:0005976	polysaccharide metabolic process	9/486	108/18112	0.00250443	0.0399099	0.0319939	59086/689995/362029/58977/65152/81675/25739/305571/192361	9
BP	GO:0007416	synapse assembly	13/486	196/18112	0.00250674	0.0399099	0.0319939	171500/29477/81005/500105/84488/300186/363058/59109/112400/295365/266777/171574/306790	13
BP	GO:0072111	cell proliferation involved in kidney development	4/486	22/18112	0.00255081	0.0402315	0.0322517	25236/85272/24577/29499	4
BP	GO:0150146	cell junction disassembly	4/486	22/18112	0.00255081	0.0402315	0.0322517	24232/298566/29687/362634	4
BP	GO:0002819	regulation of adaptive immune response	14/486	220/18112	0.00255187	0.0402315	0.0322517	24232/292594/289211/690899/24653/294269/29221/24699/246240/59086/24498/24675/289335/64036	14
BP	GO:0002369	T cell cytokine production	5/486	36/18112	0.00258498	0.0403156	0.0323191	292594/690899/29221/24498/64036	5
BP	GO:0002724	regulation of T cell cytokine production	5/486	36/18112	0.00258498	0.0403156	0.0323191	292594/690899/29221/24498/64036	5
BP	GO:0090322	regulation of superoxide metabolic process	5/486	36/18112	0.00258498	0.0403156	0.0323191	361537/24312/59086/29244/29477	5
BP	GO:0050974	detection of mechanical stimulus involved in sensory perception	6/486	52/18112	0.00259053	0.0403156	0.0323191	24577/24215/286920/59109/81574/116489	6
BP	GO:0030509	BMP signaling pathway	12/486	174/18112	0.00263079	0.0406767	0.0326086	25236/85272/84397/84046/690899/59086/83727/303689/300652/25495/79210/117140	12
BP	GO:0048511	rhythmic process	21/486	398/18112	0.00263169	0.0406767	0.0326086	360243/84397/24653/54237/25620/114519/312299/81686/24618/304407/24498/24596/500105/65248/25368/24258/192251/84409/59109/293451/25698	21
BP	GO:0006801	superoxide metabolic process	7/486	70/18112	0.00267626	0.0406767	0.0326086	361537/66021/24312/59086/29244/29477/117038	7
BP	GO:0021695	cerebellar cortex development	7/486	70/18112	0.00267626	0.0406767	0.0326086	360243/312299/24215/79433/500105/311349/361672	7
BP	GO:0034103	regulation of tissue remodeling	8/486	89/18112	0.00267957	0.0406767	0.0326086	307403/84604/113955/24498/315579/54231/24241/24476	8
BP	GO:0002725	negative regulation of T cell cytokine production	3/486	11/18112	0.00269777	0.0406767	0.0326086	292594/690899/29221	3
BP	GO:0019227	neuronal action potential propagation	3/486	11/18112	0.00269777	0.0406767	0.0326086	84008/58950/81574	3
BP	GO:0051351	positive regulation of ligase activity	3/486	11/18112	0.00269777	0.0406767	0.0326086	246240/404280/29739	3
BP	GO:0098870	action potential propagation	3/486	11/18112	0.00269777	0.0406767	0.0326086	84008/58950/81574	3
BP	GO:1900454	positive regulation of long-term synaptic depression	3/486	11/18112	0.00269777	0.0406767	0.0326086	171500/29477/25736	3
BP	GO:0030282	bone mineralization	10/486	131/18112	0.00282043	0.0420729	0.0337279	25236/85272/24653/24477/113955/24695/59086/315716/85267/81733	10
BP	GO:0071384	cellular response to corticosteroid stimulus	10/486	131/18112	0.00282043	0.0420729	0.0337279	116685/29221/170896/24795/24617/25464/59086/24498/24166/25698	10
BP	GO:0071774	response to fibroblast growth factor	10/486	131/18112	0.00282043	0.0420729	0.0337279	361945/24577/24617/24596/29739/25327/25495/25444/24247/499349	10
BP	GO:0044703	multi-organism reproductive process	18/486	322/18112	0.00282514	0.0420729	0.0337279	24653/24484/29221/29151/171045/24617/360468/24268/81686/24618/59086/304407/29477/64036/260321/171574/24602/24241	18
BP	GO:0051147	regulation of muscle cell differentiation	11/486	153/18112	0.00283591	0.0421037	0.0337525	312299/54410/24962/84604/361430/59086/29499/29480/112400/25444/306600	11
BP	GO:0099084	postsynaptic specialization organization	6/486	53/18112	0.00285635	0.0422755	0.0338902	81005/500105/84008/363058/266777/81821	6
BP	GO:0090287	regulation of cellular response to growth factor stimulus	17/486	297/18112	0.00287226	0.0422755	0.0338902	25236/84397/84046/690899/59107/309499/59086/83727/24596/303689/24401/300652/25495/117038/25444/79210/499349	17
BP	GO:0032410	negative regulation of transporter activity	8/486	90/18112	0.00287368	0.0422755	0.0338902	84604/81869/83579/29639/361089/314622/58950/29737	8
BP	GO:0010043	response to zinc ion	7/486	71/18112	0.0029019	0.0425612	0.0341193	29221/25383/84604/24230/54231/117038/25698	7
BP	GO:0046651	lymphocyte proliferation	18/486	323/18112	0.0029198	0.0426277	0.0341726	292594/84046/289211/690899/29221/361537/24699/113955/246240/59086/315716/24498/29499/25368/24806/58950/64036/680006	18
BP	GO:0009069	serine family amino acid metabolic process	5/486	37/18112	0.00292405	0.0426277	0.0341726	24962/24312/81718/25274/29739	5
BP	GO:0016064	immunoglobulin mediated immune response	11/486	154/18112	0.00298239	0.0432179	0.0346458	24232/289211/298566/294269/29687/24699/295703/362634/59086/289335/64036	11
BP	GO:0021549	cerebellum development	11/486	154/18112	0.00298239	0.0432179	0.0346458	360243/289211/312299/24215/79433/500105/300186/24183/311349/361672/25327	11
BP	GO:0106027	neuron projection organization	9/486	111/18112	0.00301613	0.0434183	0.0348064	289211/171500/303222/500105/24213/84356/24245/171574/171039	9
BP	GO:1902106	negative regulation of leukocyte differentiation	9/486	111/18112	0.00301613	0.0434183	0.0348064	113937/292594/84397/24577/362634/29499/83727/315579/24241	9
BP	GO:0000272	polysaccharide catabolic process	4/486	23/18112	0.00302314	0.0434183	0.0348064	689995/362029/65152/25739	4
BP	GO:1990778	protein localization to cell periphery	20/486	377/18112	0.00309583	0.0443308	0.0355379	58965/54319/360468/59086/303222/81005/84488/259243/25531/57033/252857/24245/60377/171058/25736/65199/288689/266777/29272/25265	20
BP	GO:0050905	neuromuscular process	13/486	201/18112	0.00311675	0.0444987	0.0356725	29151/29244/24215/79433/500105/84008/112400/81574/308709/25456/29738/360916/24245	13
BP	GO:0007189	adenylate cyclase-activating G protein-coupled receptor signaling pathway	11/486	155/18112	0.00313491	0.0445937	0.0357487	58965/170896/24695/24166/289180/171519/24258/291713/252857/24241/24476	11
BP	GO:0098900	regulation of action potential	7/486	72/18112	0.00314183	0.0445937	0.0357487	78956/500105/84488/24806/29738/252857/25736	7
BP	GO:1904064	positive regulation of cation transmembrane transport	12/486	178/18112	0.00316899	0.0448477	0.0359523	308113/50654/81869/54296/295365/246153/25327/288689/29272/24602/306811/24476	12
BP	GO:0034766	negative regulation of ion transmembrane transport	9/486	112/18112	0.00320389	0.04517	0.0362106	84604/59086/81869/83579/29639/314622/58950/29737/29480	9
BP	GO:0051402	neuron apoptotic process	18/486	326/18112	0.00321976	0.04517	0.0362106	113959/361537/24618/290655/29707/24596/117520/300186/84480/288753/113893/59109/29739/24245/25736/65199/117038/24417	18
BP	GO:0071219	cellular response to molecule of bacterial origin	18/486	326/18112	0.00321976	0.04517	0.0362106	27064/117540/25661/289211/64519/29221/171164/64467/24617/25464/84604/60350/170819/24230/59086/24498/64036/25698	18
BP	GO:0045637	regulation of myeloid cell differentiation	14/486	226/18112	0.00325567	0.0455417	0.0365087	113937/292594/84397/307403/25056/24577/361537/362634/59086/83727/315579/54231/288689/24241	14
BP	GO:0007568	aging	20/486	379/18112	0.00328602	0.045691	0.0366284	360243/298566/24653/24484/29221/29687/84604/24268/81686/295703/24230/59086/24498/59109/29739/50664/432358/25265/24241/25698	20
BP	GO:0010714	positive regulation of collagen metabolic process	5/486	38/18112	0.0032941	0.045691	0.0366284	690899/59107/29151/24617/59086	5
BP	GO:0006942	regulation of striated muscle contraction	8/486	92/18112	0.00329466	0.045691	0.0366284	29151/84488/58950/24258/24211/29571/24602/114862	8
BP	GO:0015850	organic hydroxy compound transport	16/486	276/18112	0.00332986	0.0457204	0.0366519	64519/24484/24577/24230/24498/26989/65248/24806/25731/24258/85264/286920/25531/112400/25736/25265	16
BP	GO:0042098	T cell proliferation	14/486	227/18112	0.0033871	0.0457204	0.0366519	292594/690899/29221/24699/113955/246240/59086/315716/24498/29499/25368/58950/64036/680006	14
BP	GO:0031103	axon regeneration	7/486	73/18112	0.00339661	0.0457204	0.0366519	114122/81686/24230/24312/58950/112400/303311	7
BP	GO:0050432	catecholamine secretion	7/486	73/18112	0.00339661	0.0457204	0.0366519	64519/26989/25731/24258/25531/25736/25265	7
BP	GO:1903707	negative regulation of hemopoiesis	9/486	113/18112	0.00340073	0.0457204	0.0366519	113937/292594/84397/24577/362634/29499/83727/315579/24241	9
BP	GO:0046676	negative regulation of insulin secretion	6/486	55/18112	0.00344854	0.0457204	0.0366519	83727/58950/24258/24877/25736/25196	6
BP	GO:0045638	negative regulation of myeloid cell differentiation	8/486	93/18112	0.00352234	0.0457204	0.0366519	113937/292594/84397/24577/362634/83727/315579/24241	8
BP	GO:0002924	negative regulation of humoral immune response mediated by circulating immunoglobulin	3/486	12/18112	0.00352584	0.0457204	0.0366519	289211/289335/64036	3
BP	GO:0009163	nucleoside biosynthetic process	3/486	12/18112	0.00352584	0.0457204	0.0366519	58813/24183/25368	3
BP	GO:0021684	cerebellar granular layer formation	3/486	12/18112	0.00352584	0.0457204	0.0366519	360243/24215/361672	3
BP	GO:0021707	cerebellar granule cell differentiation	3/486	12/18112	0.00352584	0.0457204	0.0366519	360243/24215/361672	3
BP	GO:0034404	nucleobase-containing small molecule biosynthetic process	3/486	12/18112	0.00352584	0.0457204	0.0366519	58813/24183/25368	3
BP	GO:0042451	purine nucleoside biosynthetic process	3/486	12/18112	0.00352584	0.0457204	0.0366519	58813/24183/25368	3
BP	GO:0042455	ribonucleoside biosynthetic process	3/486	12/18112	0.00352584	0.0457204	0.0366519	58813/24183/25368	3
BP	GO:0046129	purine ribonucleoside biosynthetic process	3/486	12/18112	0.00352584	0.0457204	0.0366519	58813/24183/25368	3
BP	GO:0051340	regulation of ligase activity	3/486	12/18112	0.00352584	0.0457204	0.0366519	246240/404280/29739	3
BP	GO:0051971	positive regulation of transmission of nerve impulse	3/486	12/18112	0.00352584	0.0457204	0.0366519	24498/500105/252857	3
BP	GO:0070444	oligodendrocyte progenitor proliferation	3/486	12/18112	0.00352584	0.0457204	0.0366519	29499/24166/25495	3
BP	GO:0070445	regulation of oligodendrocyte progenitor proliferation	3/486	12/18112	0.00352584	0.0457204	0.0366519	29499/24166/25495	3
BP	GO:0071377	cellular response to glucagon stimulus	3/486	12/18112	0.00352584	0.0457204	0.0366519	29221/24617/25698	3
BP	GO:0072075	metanephric mesenchyme development	3/486	12/18112	0.00352584	0.0457204	0.0366519	85272/24577/29499	3
BP	GO:1990834	response to odorant	3/486	12/18112	0.00352584	0.0457204	0.0366519	65205/500105/84488	3
BP	GO:0030449	regulation of complement activation	4/486	24/18112	0.00355184	0.0457204	0.0366519	24232/295703/289335/64036	4
BP	GO:0045591	positive regulation of regulatory T cell differentiation	4/486	24/18112	0.00355184	0.0457204	0.0366519	292594/690899/294269/59086	4
BP	GO:0051882	mitochondrial depolarization	4/486	24/18112	0.00355184	0.0457204	0.0366519	24230/24596/29739/24401	4
BP	GO:0060252	positive regulation of glial cell proliferation	4/486	24/18112	0.00355184	0.0457204	0.0366519	24577/24230/24498/112400	4
BP	GO:0097067	cellular response to thyroid hormone stimulus	4/486	24/18112	0.00355184	0.0457204	0.0366519	50654/24213/29739/25196	4
BP	GO:0090276	regulation of peptide hormone secretion	15/486	253/18112	0.0035776	0.0459299	0.0368199	29151/24498/24166/83727/24675/65152/58950/24258/85264/24877/81024/25736/25196/303382/24247	15
BP	GO:0030168	platelet activation	9/486	114/18112	0.00360695	0.0461843	0.0370238	25661/24653/64519/309186/64467/24498/361288/315579/25265	9
BP	GO:0006941	striated muscle contraction	12/486	181/18112	0.00362845	0.046337	0.0371462	29151/84488/24213/58950/24258/24211/81574/308709/29571/65195/24602/114862	12
BP	GO:0051146	striated muscle cell differentiation	18/486	330/18112	0.00365918	0.0464595	0.0372444	54237/360626/362332/309499/312299/25216/84604/361430/59086/29499/79433/500105/84008/29480/112400/25105/24602/306600	18
BP	GO:0001649	osteoblast differentiation	14/486	229/18112	0.00366297	0.0464595	0.0372444	85272/84397/84046/24484/25695/113955/24695/315716/24498/29499/81733/25495/25444/306790	14
BP	GO:0051149	positive regulation of muscle cell differentiation	7/486	74/18112	0.00366684	0.0464595	0.0372444	24962/84604/361430/59086/29499/112400/306600	7
BP	GO:0002701	negative regulation of production of molecular mediator of immune response	5/486	39/18112	0.00369667	0.0464725	0.0372548	292594/289211/690899/29221/59086	5
BP	GO:0007212	dopamine receptor signaling pathway	5/486	39/18112	0.00369667	0.0464725	0.0372548	83579/497878/29480/50664/192349	5
BP	GO:0009119	ribonucleoside metabolic process	5/486	39/18112	0.00369667	0.0464725	0.0372548	25383/289801/58813/24183/25368	5
BP	GO:0099072	regulation of postsynaptic membrane neurotransmitter receptor levels	8/486	94/18112	0.00376201	0.0469906	0.0376701	303222/81005/112400/57033/252857/192349/266777/171574	8
BP	GO:1903351	cellular response to dopamine	8/486	94/18112	0.00376201	0.0469906	0.0376701	83579/497878/29480/50664/58963/192349/25323/79246	8
BP	GO:0001706	endoderm formation	6/486	56/18112	0.00377672	0.0469906	0.0376701	114856/25661/25683/81686/301012/25495	6
BP	GO:2000649	regulation of sodium ion transmembrane transporter activity	6/486	56/18112	0.00377672	0.0469906	0.0376701	308113/84488/29639/63848/288689/306811	6
BP	GO:0110148	biomineralization	12/486	182/18112	0.00379302	0.0470273	0.0376995	25236/85272/24653/24477/113955/24695/59086/315716/58813/24215/85267/81733	12
BP	GO:0010720	positive regulation of cell development	20/486	384/18112	0.00380462	0.0470273	0.0376995	25661/84046/24577/361537/24230/59086/24498/302965/29499/171500/29477/24183/501625/84409/112400/295365/24245/25495/24916/306790	20
BP	GO:0019724	B cell mediated immunity	11/486	159/18112	0.00380882	0.0470273	0.0376995	24232/289211/298566/294269/29687/24699/295703/362634/59086/289335/64036	11
BP	GO:1901653	cellular response to peptide	23/486	466/18112	0.00387827	0.047763	0.0382893	25661/289211/29221/24577/24617/25464/25383/59086/24498/83727/24596/24213/85256/65248/306243/54231/24401/300652/304282/25196/117243/24247/25698	23
BP	GO:0097421	liver regeneration	7/486	75/18112	0.00395311	0.0484433	0.0388347	24577/312299/84604/59086/24498/29499/303547	7
BP	GO:0050866	negative regulation of cell activation	14/486	231/18112	0.0039569	0.0484433	0.0388347	292594/84046/289211/690899/29221/361537/54410/113955/59086/315716/29185/29499/315579/680006	14
BP	GO:0051592	response to calcium ion	12/486	183/18112	0.00396354	0.0484433	0.0388347	114856/24653/25216/25383/24498/60395/65248/25731/25736/25196/25105/24247	12
BP	GO:0060401	cytosolic calcium ion transport	13/486	207/18112	0.00400303	0.0488026	0.0391228	24699/59086/84550/81869/365567/364601/60395/315579/58950/83810/24241/29599/24476	13
BP	GO:1903350	response to dopamine	8/486	95/18112	0.0040141	0.0488147	0.0391325	83579/497878/29480/50664/58963/192349/25323/79246	8
BP	GO:0008277	regulation of G protein-coupled receptor signaling pathway	10/486	138/18112	0.00409925	0.0496009	0.0397627	24232/58965/24166/54296/688272/29480/24258/54290/24245/24241	10
BP	GO:0070301	cellular response to hydrogen peroxide	10/486	138/18112	0.00409925	0.0496009	0.0397627	54237/29221/312299/24617/24618/246240/24498/84480/65248/24916	10
BP	GO:0002274	myeloid leukocyte activation	15/486	257/18112	0.00413749	0.0498443	0.0399578	113959/292594/117540/25661/298566/24653/361537/54410/24617/84604/59086/29185/24258/83810/24602	15
BP	GO:0002495	antigen processing and presentation of peptide antigen via MHC class II	4/486	25/18112	0.00413996	0.0498443	0.0399578	289211/294269/290644/50654	4
BP	GO:0016311	dephosphorylation	21/486	414/18112	0.00415433	0.0498932	0.039997	114856/315648/24699/171125/246240/59086/58813/24675/294930/689995/304488/305935/116482/315579/58950/295341/24211/727679/306790/192361/309014	21
BP	GO:0002695	negative regulation of leukocyte activation	13/486	208/18112	0.00416881	0.0499432	0.0400371	292594/84046/289211/690899/29221/361537/54410/113955/59086/315716/29185/29499/680006	13
CC	GO:0034703	cation channel complex	34/492	220/18418	1.08173e-16	4.94349e-14	3.89421e-14	497770/93667/78956/365567/364601/60395/500105/116482/259243/58950/306243/29737/116695/25469/81574/295365/58963/246153/29738/29701/83834/25327/29571/116489/25736/65199/65195/29272/29559/83588/117023/79246/60326/114862	34
CC	GO:0034702	ion channel complex	38/492	289/18418	4.14929e-16	9.48113e-14	7.46872e-14	497770/29707/93667/78956/365567/364601/60395/500105/116482/259243/58950/306243/29737/116695/25469/296566/81574/295365/25456/58963/246153/29738/29701/83834/25327/29571/116489/25736/25101/65199/65195/29272/29559/83588/117023/79246/60326/114862	38
CC	GO:1902495	transmembrane transporter complex	42/492	371/18418	2.49776e-15	3.80492e-13	2.99731e-13	497770/29707/93667/78956/365567/364601/60395/500105/29639/24213/116482/301458/259243/58950/306243/29737/116695/25469/24211/296566/81574/295365/25456/58963/246153/29738/29701/83834/25327/29571/116489/25736/25101/65199/65195/29272/29559/83588/117023/79246/60326/114862	42
CC	GO:1990351	transporter complex	43/492	392/18418	3.56694e-15	4.07523e-13	3.21025e-13	497770/29707/93667/78956/365567/364601/60395/500105/29639/24213/116482/301458/259243/58950/306243/29737/116695/25469/24211/296566/81574/295365/25456/58963/246153/29738/29701/83834/25327/29571/116489/25736/25101/65199/65195/29272/29559/83588/117023/306600/79246/60326/114862	43
CC	GO:0097060	synaptic membrane	44/492	467/18418	3.84069e-13	3.5104e-11	2.7653e-11	29464/64519/58813/29707/24215/93667/54296/83589/500105/24213/84008/116695/363058/25731/25469/83633/112400/81574/295382/57033/312166/25456/58963/83810/246153/29701/317232/29722/25327/29571/60377/25736/25101/65195/171574/29559/25265/25041/79246/29599/114862/171039/266711/24417	44
CC	GO:0034705	potassium channel complex	18/492	87/18418	1.2367e-11	9.41949e-10	7.42017e-10	500105/259243/29737/116695/25469/295365/246153/29738/25327/116489/25736/65199/65195/29272/29559/83588/117023/60326	18
CC	GO:0008076	voltage-gated potassium channel complex	16/492	73/18418	6.85276e-11	4.47387e-09	3.52427e-09	500105/259243/29737/116695/25469/295365/246153/29738/25327/25736/65199/65195/29272/83588/117023/60326	16
CC	GO:0042734	presynaptic membrane	24/492	211/18418	2.45677e-09	1.40343e-07	1.10554e-07	29707/24215/83589/500105/24213/84008/363058/25469/83633/112400/81574/295382/312166/246153/29701/29722/25327/29571/29559/25265/79246/29599/114862/24417	24
CC	GO:0045211	postsynaptic membrane	30/492	322/18418	3.12577e-09	1.58719e-07	1.25031e-07	29464/29707/24215/54296/116695/363058/25469/83633/112400/57033/312166/25456/58963/83810/246153/317232/29722/25327/60377/25736/25101/65195/171574/29559/25265/25041/79246/114862/171039/266711	30
CC	GO:0098889	intrinsic component of presynaptic membrane	18/492	134/18418	1.85171e-08	8.46234e-07	6.66617e-07	29707/24215/24213/363058/25469/83633/112400/81574/295382/29701/25327/29571/29559/25265/79246/29599/114862/24417	18
CC	GO:0099056	integral component of presynaptic membrane	17/492	121/18418	2.33098e-08	9.68416e-07	7.62866e-07	29707/24215/24213/363058/25469/83633/112400/81574/29701/25327/29571/29559/25265/79246/29599/114862/24417	17
CC	GO:0044304	main axon	14/492	87/18418	7.11585e-08	2.70705e-06	2.13247e-06	29151/29477/500105/84008/29737/363058/25469/84409/112400/81574/246153/29738/29722/25327	14
CC	GO:0099699	integral component of synaptic membrane	23/492	233/18418	7.70058e-08	2.70705e-06	2.13247e-06	29464/29707/24215/24213/363058/25731/25469/83633/112400/81574/57033/29701/25327/29571/25101/65195/29559/25265/25041/79246/29599/114862/24417	23
CC	GO:0099240	intrinsic component of synaptic membrane	24/492	253/18418	8.56012e-08	2.79427e-06	2.20117e-06	29464/29707/24215/24213/363058/25731/25469/83633/112400/81574/295382/57033/29701/25327/29571/25101/65195/29559/25265/25041/79246/29599/114862/24417	24
CC	GO:0031012	extracellular matrix	31/492	408/18418	1.92646e-07	5.86928e-06	4.6235e-06	114122/304960/117540/361945/25236/85272/25661/25683/64519/59107/24477/361821/309816/171045/85251/65205/64467/24617/367313/81686/116487/301012/59086/29499/83727/315728/29331/295382/282583/25444/315691	31
CC	GO:0030312	external encapsulating structure	31/492	410/18418	2.14598e-07	6.12947e-06	4.82846e-06	114122/304960/117540/361945/25236/85272/25661/25683/64519/59107/24477/361821/309816/171045/85251/65205/64467/24617/367313/81686/116487/301012/59086/29499/83727/315728/29331/295382/282583/25444/315691	31
CC	GO:0044309	neuron spine	22/492	233/18418	3.21095e-07	8.63179e-06	6.79966e-06	289211/24215/79433/24596/303222/83589/500105/24213/116695/25469/54290/83810/29722/286923/252857/65195/117038/171574/192361/25041/171039/266711	22
CC	GO:0150034	distal axon	32/492	442/18418	3.61774e-07	9.18505e-06	7.23549e-06	29151/24166/93667/79433/24596/303882/29477/84488/24949/81730/24213/291129/25624/314622/25531/113893/24401/54290/246153/29738/29722/260321/252857/25327/65199/432358/29559/192361/25269/24241/24247/24417	32
CC	GO:0043197	dendritic spine	21/492	229/18418	9.6105e-07	2.31158e-05	1.82094e-05	289211/24215/79433/24596/303222/83589/24213/116695/25469/54290/83810/29722/286923/252857/65195/117038/171574/192361/25041/171039/266711	21
CC	GO:0048786	presynaptic active zone	13/492	100/18418	2.57597e-06	5.88609e-05	4.63674e-05	81717/24215/303222/83589/500105/24949/84008/25531/112400/295382/25265/114862/24417	13
CC	GO:0001518	voltage-gated sodium channel complex	6/492	17/18418	3.39545e-06	7.38914e-05	5.82077e-05	497770/78956/81574/29701/29571/114862	6
CC	GO:0062023	collagen-containing extracellular matrix	21/492	250/18418	3.92249e-06	8.14808e-05	6.41862e-05	114122/117540/361945/25236/85272/25661/25683/64519/59107/361821/309816/85251/64467/24617/116487/301012/59086/83727/295382/282583/25444	21
CC	GO:0048787	presynaptic active zone membrane	9/492	48/18418	4.27378e-06	8.49181e-05	6.68939e-05	24215/83589/500105/84008/112400/295382/25265/114862/24417	9
CC	GO:0034706	sodium channel complex	7/492	27/18418	5.19353e-06	9.88935e-05	7.7903e-05	497770/78956/81574/29701/29571/29559/114862	7
CC	GO:0032279	asymmetric synapse	29/492	433/18418	5.97217e-06	0.000109171	8.59992e-05	64519/24215/24596/303222/29477/500105/24949/84480/116695/363058/25469/24211/112400/57033/29738/286923/252857/24245/60377/25101/65195/117038/171574/29559/24916/25265/25041/266711/81821	29
CC	GO:0098984	neuron to neuron synapse	30/492	461/18418	7.28091e-06	0.000127976	0.000100813	64519/24215/24596/303222/29477/500105/24949/24213/84480/116695/363058/25469/24211/112400/57033/29738/286923/252857/24245/60377/25101/65195/117038/171574/29559/24916/25265/25041/266711/81821	30
CC	GO:0032589	neuron projection membrane	11/492	79/18418	7.75618e-06	0.000129725	0.00010219	29707/24215/24596/29477/500105/84409/112400/83810/246153/25327/25736	11
CC	GO:0043204	perikaryon	18/492	201/18418	7.94812e-06	0.000129725	0.00010219	29151/24166/93667/24596/287847/29737/83633/295365/303311/25456/246153/24245/25736/432358/24916/24602/114862/25698	18
CC	GO:0043679	axon terminus	19/492	231/18418	1.51773e-05	0.000239173	0.000188408	29151/24166/24949/24213/25624/25531/113893/24401/54290/246153/29738/252857/25327/65199/29559/25269/24241/24247/24417	19
CC	GO:0030673	axolemma	6/492	22/18418	1.82697e-05	0.000278308	0.000219236	29477/500105/84409/112400/246153/25327	6
CC	GO:0031256	leading edge membrane	16/492	180/18418	2.75854e-05	0.000406663	0.000320347	54319/361430/29707/24215/24596/303222/29477/500105/305935/84409/112400/83810/246153/25327/25736/727679	16
CC	GO:0014069	postsynaptic density	27/492	426/18418	3.30685e-05	0.000472259	0.00037202	64519/24215/24596/303222/29477/24949/84480/116695/363058/24211/112400/57033/29738/286923/252857/24245/60377/25101/65195/117038/171574/29559/24916/25265/25041/266711/81821	27
CC	GO:0032809	neuronal cell body membrane	7/492	36/18418	3.96476e-05	0.000549059	0.000432519	29707/24215/24596/295365/246153/25327/25736	7
CC	GO:0099572	postsynaptic specialization	28/492	462/18418	5.23121e-05	0.000703136	0.000553893	64519/29707/24215/24596/303222/29477/24949/84480/116695/363058/24211/112400/57033/29738/286923/252857/24245/60377/25101/65195/117038/171574/29559/24916/25265/25041/266711/81821	28
CC	GO:0044306	neuron projection terminus	19/492	255/18418	5.92782e-05	0.000774003	0.000609718	29151/24166/24949/24213/25624/25531/113893/24401/54290/246153/29738/252857/25327/65199/29559/25269/24241/24247/24417	19
CC	GO:0044298	cell body membrane	7/492	39/18418	6.81669e-05	0.000865341	0.000681669	29707/24215/24596/295365/246153/25327/25736	7
CC	GO:0005581	collagen trimer	8/492	60/18418	0.00018507	0.00228586	0.00180068	298566/25683/361821/361289/85251/29687/367313/362634	8
CC	GO:0030133	transport vesicle	25/492	423/18418	0.000192722	0.00231773	0.00182578	64519/29499/685232/83589/24949/613226/291129/85256/25624/29564/363058/315676/25731/24258/25531/66030/24211/300652/81024/171058/266777/117038/24916/25105/171039	25
CC	GO:0098945	intrinsic component of presynaptic active zone membrane	6/492	33/18418	0.00021136	0.00247671	0.00195102	24215/112400/295382/25265/114862/24417	6
CC	GO:0099055	integral component of postsynaptic membrane	14/492	174/18418	0.000248334	0.00283721	0.002235	29464/29707/24215/363058/25469/83633/112400/57033/25327/25101/65195/25041/79246/114862	14
CC	GO:0031225	anchored component of membrane	13/492	156/18418	0.000291294	0.00324686	0.0025577	25236/50692/24268/60350/58813/24949/25531/116658/295382/303311/83834/25136/171058	13
CC	GO:0031252	cell leading edge	25/492	442/18418	0.00037353	0.00406436	0.00320169	311325/54319/361430/302965/29707/24215/79433/24596/303222/29477/500105/362973/305935/79253/84409/112400/83810/246153/29722/25327/25736/727679/288689/140581/81821	25
CC	GO:0098936	intrinsic component of postsynaptic membrane	14/492	184/18418	0.000439418	0.0045668	0.00359748	29464/29707/24215/363058/25469/83633/112400/57033/25327/25101/65195/25041/79246/114862	14
CC	GO:0032590	dendrite membrane	7/492	52/18418	0.000439692	0.0045668	0.00359748	29707/24215/24596/83810/246153/25327/25736	7
CC	GO:0016324	apical plasma membrane	23/492	400/18418	0.000505058	0.00512915	0.00404047	29175/25661/29464/308113/54319/54410/360468/304407/24215/29484/685232/65248/65152/24211/112400/246153/64036/252857/25736/140581/25265/24247/266711	23
CC	GO:0098982	GABA-ergic synapse	10/492	108/18418	0.000630883	0.00618202	0.00486987	81717/29464/29707/24215/613226/83633/112400/25456/65195/29599	10
CC	GO:0030427	site of polarized growth	16/492	236/18418	0.000635788	0.00618202	0.00486987	93667/79433/24596/303882/29477/84488/81730/291129/314622/304244/113893/29722/260321/252857/432358/192361	16
CC	GO:0045121	membrane raft	23/492	409/18418	0.000685192	0.00648042	0.00510492	117540/289211/309499/315648/54319/24699/25464/360468/60350/29499/24215/54296/24596/29477/500105/24211/303311/64036/291713/25101/65195/29599/114862	23
CC	GO:0098857	membrane microdomain	23/492	410/18418	0.000708296	0.00648042	0.00510492	117540/289211/309499/315648/54319/24699/25464/360468/60350/29499/24215/54296/24596/29477/500105/24211/303311/64036/291713/25101/65195/29599/114862	23
CC	GO:0098992	neuronal dense core vesicle	4/492	16/18418	0.000709017	0.00648042	0.00510492	26989/315676/24258/24765	4
CC	GO:0099059	integral component of presynaptic active zone membrane	5/492	28/18418	0.000787721	0.0070586	0.00556038	24215/112400/25265/114862/24417	5
CC	GO:0042383	sarcolemma	13/492	176/18418	0.000917471	0.00806315	0.00635172	360626/362332/361821/54319/367313/24675/24213/24211/81574/308709/25736/65195/114862	13
CC	GO:0005604	basement membrane	10/492	115/18418	0.00102944	0.00887648	0.00699241	25661/64519/309816/85251/64467/116487/301012/83727/295382/25444	10
CC	GO:0030426	growth cone	15/492	229/18418	0.00131327	0.0111142	0.00875514	93667/79433/24596/303882/29477/84488/81730/291129/314622/113893/29722/260321/252857/432358/192361	15
CC	GO:0098878	neurotransmitter receptor complex	6/492	47/18418	0.00149501	0.0122119	0.00961987	93667/116482/58963/83834/29559/79246	6
CC	GO:0008021	synaptic vesicle	16/492	256/18418	0.00149979	0.0122119	0.00961987	64519/29499/83589/24949/613226/85256/25624/363058/315676/25531/66030/81024/171058/117038/24916/171039	16
CC	GO:0009897	external side of plasma membrane	24/492	461/18418	0.00152315	0.0122119	0.00961987	113937/29175/289211/690899/64195/64519/25216/54410/24699/25464/60350/290655/315716/362431/58813/24498/24596/304900/85264/112400/303311/83810/64036/25136	24
CC	GO:0098688	parallel fiber to Purkinje cell synapse	5/492	33/18418	0.00170472	0.013432	0.010581	24215/312166/25041/29599/24417	5
CC	GO:0070382	exocytic vesicle	18/492	310/18418	0.00178867	0.0138546	0.0109139	64519/29499/83589/24949/613226/85256/25624/363058/315676/25731/25531/66030/24211/81024/171058/117038/24916/171039	18
CC	GO:0044224	juxtaparanode region of axon	3/492	10/18418	0.00197631	0.0150529	0.0118579	500105/29737/29738	3
CC	GO:0045178	basal part of cell	18/492	319/18418	0.00244077	0.0179497	0.0141398	113959/292657/29464/64519/54319/304407/24215/29639/54231/363058/24211/112400/246153/252857/60377/25265/24247/312711	18
CC	GO:0043195	terminal bouton	10/492	129/18418	0.00244247	0.0179497	0.0141398	24166/24949/25624/25531/113893/246153/29559/25269/24241/24417	10
CC	GO:0009925	basal plasma membrane	17/492	294/18418	0.00247446	0.0179497	0.0141398	113959/292657/29464/64519/54319/304407/24215/29639/54231/363058/24211/246153/252857/60377/25265/24247/312711	17
CC	GO:0001527	microfibril	3/492	12/18418	0.00348177	0.0242619	0.0191122	59107/83727/315728	3
CC	GO:0005890	sodium:potassium-exchanging ATPase complex	3/492	12/18418	0.00348177	0.0242619	0.0191122	29639/24213/24211	3
CC	GO:0098802	plasma membrane signaling receptor complex	12/492	181/18418	0.00350391	0.0242619	0.0191122	58965/59086/24498/93667/116482/288753/83633/58963/83834/25101/29559/79246	12
CC	GO:0060076	excitatory synapse	7/492	78/18418	0.0047985	0.0327301	0.025783	24215/500105/312166/252857/25041/29599/24417	7
CC	GO:0016323	basolateral plasma membrane	15/492	263/18418	0.00491242	0.0330144	0.0260069	113959/29464/64519/54319/24215/29639/54231/363058/24211/246153/252857/60377/25265/24247/312711	15
CC	GO:0043194	axon initial segment	4/492	27/18418	0.00542079	0.0359029	0.0282824	500105/25469/81574/29738	4
CC	GO:0016234	inclusion body	7/492	80/18418	0.00551419	0.0359998	0.0283587	29477/362029/360592/113893/117038/24476/364823	7
CC	GO:0016528	sarcoplasm	7/492	81/18418	0.00590064	0.0379802	0.0299188	64455/362332/81869/362029/79131/58950/24245	7
CC	GO:0031253	cell projection membrane	18/492	350/18418	0.00638473	0.0405253	0.0319237	29464/54319/64467/361430/29707/24215/29484/24596/29477/500105/305935/84409/112400/83810/246153/25327/25736/727679	18
CC	GO:0043235	receptor complex	20/492	413/18418	0.00796176	0.0498428	0.0392635	58965/307403/60350/290655/59086/24498/29707/93667/116482/288753/83633/59109/58963/83834/25136/25101/29559/25041/287805/79246	20
MF	GO:0022836	gated channel activity	38/461	328/16650	7.54889e-14	5.59373e-11	4.97432e-11	497770/361430/29707/78956/60395/259243/306243/29737/116695/286920/25469/296566/81574/25456/58963/83810/246153/29738/29701/360916/25327/29571/309407/116489/25736/25101/65199/65195/79123/266760/116745/29559/83588/117023/25041/79246/60326/114862	38
MF	GO:0005261	cation channel activity	37/461	335/16650	7.12952e-13	2.35837e-10	2.09722e-10	497770/361430/84550/685232/78956/60395/85267/259243/306243/29737/116695/286920/25469/81574/58963/83810/246153/29738/29701/25327/29571/309407/116489/25736/25101/65199/65195/79123/266760/116745/29559/83588/117023/25041/79246/60326/114862	37
MF	GO:0005216	ion channel activity	42/461	427/16650	9.54806e-13	2.35837e-10	2.09722e-10	497770/361430/304407/29707/84550/685232/78956/60395/85267/259243/306243/29737/116695/286920/25469/296566/81574/25456/58963/83810/246153/29738/29701/360916/25327/29571/309407/116489/25736/25101/65199/65195/79123/266760/116745/29559/83588/117023/25041/79246/60326/114862	42
MF	GO:0015267	channel activity	42/461	477/16650	3.51959e-11	5.21604e-09	4.63845e-09	497770/361430/304407/29707/84550/685232/78956/60395/85267/259243/306243/29737/116695/286920/25469/296566/81574/25456/58963/83810/246153/29738/29701/360916/25327/29571/309407/116489/25736/25101/65199/65195/79123/266760/116745/29559/83588/117023/25041/79246/60326/114862	42
MF	GO:0022803	passive transmembrane transporter activity	42/461	477/16650	3.51959e-11	5.21604e-09	4.63845e-09	497770/361430/304407/29707/84550/685232/78956/60395/85267/259243/306243/29737/116695/286920/25469/296566/81574/25456/58963/83810/246153/29738/29701/360916/25327/29571/309407/116489/25736/25101/65199/65195/79123/266760/116745/29559/83588/117023/25041/79246/60326/114862	42
MF	GO:0005244	voltage-gated ion channel activity	23/461	191/16650	3.32841e-09	3.52336e-07	3.13321e-07	497770/78956/259243/306243/29737/116695/25469/296566/81574/246153/29738/29701/25327/29571/25736/65199/65195/266760/116745/83588/117023/60326/114862	23
MF	GO:0022832	voltage-gated channel activity	23/461	191/16650	3.32841e-09	3.52336e-07	3.13321e-07	497770/78956/259243/306243/29737/116695/25469/296566/81574/246153/29738/29701/25327/29571/25736/65199/65195/266760/116745/83588/117023/60326/114862	23
MF	GO:0046873	metal ion transmembrane transporter activity	35/461	415/16650	5.05495e-09	4.68215e-07	4.16368e-07	29464/497770/24215/84550/78956/60395/24213/85267/259243/306243/29737/116695/286920/25469/24211/81574/83810/246153/29738/29701/25327/29571/116489/25736/65199/65195/79123/266760/116745/29559/83588/117023/60326/29599/114862	35
MF	GO:0015079	potassium ion transmembrane transporter activity	20/461	156/16650	1.21069e-08	9.96801e-07	8.86423e-07	84550/24213/85267/259243/29737/116695/25469/24211/246153/29738/25327/116489/25736/65199/65195/116745/29559/83588/117023/60326	20
MF	GO:0005272	sodium channel activity	10/461	44/16650	2.56244e-07	1.89877e-05	1.68851e-05	497770/78956/286920/81574/29701/29571/79123/266760/29559/114862	10
MF	GO:0005267	potassium channel activity	16/461	123/16650	2.87223e-07	1.93484e-05	1.72059e-05	259243/29737/116695/25469/246153/29738/25327/116489/25736/65199/65195/116745/29559/83588/117023/60326	16
MF	GO:0005248	voltage-gated sodium channel activity	7/461	25/16650	3.71756e-06	0.000229559	0.00020414	497770/78956/81574/29701/29571/266760/114862	7
MF	GO:0005249	voltage-gated potassium channel activity	12/461	89/16650	6.05211e-06	0.00034497	0.000306771	29737/116695/25469/246153/29738/25327/25736/65195/116745/83588/117023/60326	12
MF	GO:0099106	ion channel regulator activity	15/461	139/16650	7.24029e-06	0.000383218	0.000340783	84488/29639/259243/58950/306243/29737/63848/295365/83810/29738/65199/29272/117023/306811/64626	15
MF	GO:0015081	sodium ion transmembrane transporter activity	15/461	143/16650	1.02467e-05	0.000506186	0.000450135	29464/497770/84550/78956/24213/85267/286920/24211/81574/29701/29571/79123/266760/29559/114862	15
MF	GO:0016247	channel regulator activity	15/461	145/16650	1.213e-05	0.000561772	0.000499566	84488/29639/259243/58950/306243/29737/63848/295365/83810/29738/65199/29272/117023/306811/64626	15
MF	GO:0051427	hormone receptor binding	7/461	30/16650	1.39647e-05	0.000608699	0.000541296	29151/170896/24695/24166/50664/25105/24602	7
MF	GO:0022843	voltage-gated cation channel activity	14/461	143/16650	4.37198e-05	0.0017998	0.0016005	306243/29737/116695/25469/246153/29738/25327/25736/65195/116745/83588/117023/60326/114862	14
MF	GO:0005179	hormone activity	13/461	129/16650	6.03585e-05	0.00235398	0.00209332	29151/170896/84604/24695/24166/83727/24797/171519/25196/25105/24602/24241/24476	13
MF	GO:0015459	potassium channel regulator activity	8/461	52/16650	8.39057e-05	0.00301096	0.00267755	259243/29737/295365/29738/65199/29272/117023/306811	8
MF	GO:0044325	transmembrane transporter binding	14/461	152/16650	8.53307e-05	0.00301096	0.00267755	24230/500105/84488/314622/58950/29737/246153/29738/25327/29571/25736/65199/65195/24247	14
MF	GO:0005539	glycosaminoglycan binding	17/461	218/16650	0.000125183	0.00421639	0.0037495	114122/361945/85272/25661/84397/24699/113955/24618/29569/29499/83727/29331/303311/81733/25444/79210/499349	17
MF	GO:0005516	calmodulin binding	15/461	178/16650	0.000132043	0.00425408	0.00378302	497770/305494/308451/24962/24215/24675/79433/24596/306722/60341/83810/291713/24245/29599/24417	15
MF	GO:0031402	sodium ion binding	4/461	11/16650	0.000163991	0.00506322	0.00450256	497770/78956/24211/81574	4
MF	GO:0051428	peptide hormone receptor binding	5/461	20/16650	0.000174949	0.0051855	0.0046113	29151/170896/24695/24166/50664	5
MF	GO:0048018	receptor ligand activity	27/461	458/16650	0.000196858	0.00561044	0.00498918	85272/306748/29151/170896/84604/113955/170819/290655/24695/59086/24498/287910/24166/83727/84488/24797/24806/171519/112400/25444/306790/25196/25105/24765/24602/24241/24476	27
MF	GO:0030546	signaling receptor activator activity	27/461	467/16650	0.000268623	0.00737222	0.00655587	85272/306748/29151/170896/84604/113955/170819/290655/24695/59086/24498/287910/24166/83727/84488/24797/24806/171519/112400/25444/306790/25196/25105/24765/24602/24241/24476	27
MF	GO:0031420	alkali metal ion binding	5/461	22/16650	0.000283875	0.00751255	0.00668067	497770/78956/25469/24211/81574	5
MF	GO:0001968	fibronectin binding	6/461	36/16650	0.000419443	0.0107175	0.00953073	292594/29175/84397/24484/81686/50654	6
MF	GO:0001540	amyloid-beta binding	8/461	66/16650	0.000456813	0.0112833	0.0100339	289211/93667/24596/83589/24213/300652/29722/286923	8
MF	GO:0071855	neuropeptide receptor binding	6/461	37/16650	0.000489065	0.0116902	0.0103958	29151/170896/24166/24806/50664/24602	6
MF	GO:0005230	extracellular ligand-gated ion channel activity	8/461	69/16650	0.000618718	0.0143272	0.0127407	29707/25456/58963/83810/25101/29559/25041/79246	8
MF	GO:0043394	proteoglycan binding	6/461	39/16650	0.00065505	0.0147089	0.0130801	29175/25661/24699/113955/50654/24213	6
MF	GO:0005251	delayed rectifier potassium channel activity	5/461	29/16650	0.00109138	0.0237856	0.0211518	25469/246153/25327/25736/117023	5
MF	GO:0050839	cell adhesion molecule binding	18/461	290/16650	0.00125336	0.0259035	0.0230352	361945/25661/309186/24477/54319/25464/360468/113955/171125/116487/83727/363058/112400/116658/295382/171048/24247/116777	18
MF	GO:0015276	ligand-gated ion channel activity	11/461	134/16650	0.00125847	0.0259035	0.0230352	29707/286920/25456/58963/83810/25101/79123/116745/29559/25041/79246	11
MF	GO:0022834	ligand-gated channel activity	11/461	137/16650	0.00150564	0.0301536	0.0268146	29707/286920/25456/58963/83810/25101/79123/116745/29559/25041/79246	11
MF	GO:0019829	ATPase-coupled cation transmembrane transporter activity	6/461	46/16650	0.00159774	0.0311559	0.027706	56759/24215/685232/24213/24211/29599	6
MF	GO:0008201	heparin binding	12/461	160/16650	0.00168159	0.0319502	0.0284123	361945/85272/25661/24699/113955/29569/83727/303311/81733/25444/79210/499349	12
MF	GO:0099094	ligand-gated cation channel activity	9/461	103/16650	0.00222708	0.0412567	0.0366882	286920/58963/83810/25101/79123/116745/29559/25041/79246	9
MF	GO:0005231	excitatory extracellular ligand-gated ion channel activity	5/461	35/16650	0.00260376	0.0464294	0.0412882	25456/83810/25101/29559/25041	5
MF	GO:0005178	integrin binding	11/461	147/16650	0.00263163	0.0464294	0.0412882	25661/309186/24477/25464/360468/113955/116487/83727/112400/171048/24247	11

## Sheet: Supplemental Table2
Results of KEGG pathways enrichment based on pain datasets.
ID	Description	GeneRatio	BgRatio	pvalue	p.adjust	qvalue	geneID	Count
rno04610	Complement and coagulation cascades	12/264	86/8956	7.35569e-06	0.00208902	0.00181182	60325/24232/113959/362248/298566/50692/29687/54249/24617/295703/362634/64036	12
rno04115	p53 signaling pathway	9/264	73/8956	0.000273242	0.0242441	0.0210271	291005/54237/363088/24484/25112/24617/170824/292949/680110	9
rno04742	Taste transduction	10/264	91/8956	0.000327828	0.0242441	0.0210271	497770/64467/29707/78956/83633/58963/25265/25323/79246/24417	10
rno04964	Proximal tubule bicarbonate reclamation	5/264	22/8956	0.000373783	0.0242441	0.0210271	29639/24213/54231/24211/192268	5
rno04350	TGF-beta signaling pathway	10/264	94/8956	0.000426833	0.0242441	0.0210271	85272/59107/315648/24577/84604/59086/83727/315728/25495/25196	10
rno05150	Staphylococcus aureus infection	10/264	100/8956	0.000700114	0.0331387	0.0287415	24232/113959/289211/298566/294269/360626/29687/54249/25464/362634	10
rno04974	Protein digestion and absorption	10/264	103/8956	0.000883216	0.0358333	0.0310786	292657/25683/361821/85251/367313/301012/29484/29639/24213/24211	10
rno05133	Pertussis	8/264	73/8956	0.00131279	0.0439138	0.0380869	24232/298566/29687/60350/295703/362634/24498/691455	8
rno04261	Adrenergic signaling in cardiomyocytes	12/264	148/8956	0.00139164	0.0439138	0.0380869	25620/315648/24215/29639/24213/58977/306243/24211/252857/24245/691455/29599	12

## Sheet: Supplemental Table3
Results of GO enrichment based on aging datasets.
ONTOLOGY	ID	Description	GeneRatio	BgRatio	pvalue	p.adjust	qvalue	geneID	Count
BP	GO:0006959	humoral immune response	33/939	249/18112	7.02453e-07	0.00184971	0.00180886	306748/171162/298006/81828/499658/170568/25335/299606/24618/289010/192262/64389/54249/406161/24481/316010/24903/29300/641624/295703/613223/29187/360750/290257/171016/289211/171551/24714/305000/312102/24620/310693/246358	33
BP	GO:0050829	defense response to Gram-negative bacterium	19/939	100/18112	7.76861e-07	0.00184971	0.00180886	338457/170568/25335/299606/24618/64389/641637/366518/24932/29469/316010/641624/613223/290257/362629/362881/641630/293426/24620	19
BP	GO:0007162	negative regulation of cell adhesion	37/939	310/18112	2.02322e-06	0.00311327	0.00304452	113955/501043/25613/116640/298006/494343/66029/366126/25239/24367/295338/63835/292594/301482/29393/366518/24481/84586/24903/246253/689077/25081/309621/685277/308266/25747/360750/290257/25554/171016/288001/117033/171577/25408/312102/29373/287287	37
BP	GO:0061844	antimicrobial humoral immune response mediated by antimicrobial peptide	19/939	108/18112	2.61509e-06	0.00311327	0.00304452	306748/171162/298006/499658/170568/25335/299606/24618/64389/316010/24903/641624/613223/360750/171016/171551/24714/24620/246358	19
BP	GO:0022408	negative regulation of cell-cell adhesion	27/939	206/18112	8.70874e-06	0.00827366	0.00809096	113955/501043/298006/66029/366126/24367/295338/63835/292594/301482/366518/24481/84586/24903/246253/25081/309621/685277/308266/25747/360750/290257/171577/25408/312102/29373/287287	27
BP	GO:0002695	negative regulation of leukocyte activation	27/939	208/18112	1.04246e-05	0.00827366	0.00809096	113955/501043/59105/66029/64569/366126/499658/295338/63835/292594/366518/295518/24481/84586/24903/170637/309621/685277/308266/290257/289211/364403/367901/116592/25408/312102/287287	27
BP	GO:0051250	negative regulation of lymphocyte activation	24/939	176/18112	1.38928e-05	0.00945104	0.00924234	113955/501043/66029/64569/499658/295338/63835/292594/366518/295518/24481/84586/24903/170637/309621/685277/308266/290257/289211/364403/367901/25408/312102/287287	24
BP	GO:0022407	regulation of cell-cell adhesion	46/939	463/18112	1.84463e-05	0.0109801	0.0107377	113955/85272/317578/501043/291445/298006/66029/366126/294503/24367/295338/288905/63835/299606/292594/362282/301482/309684/366518/64025/24481/24932/84586/24903/246253/308995/25081/309621/685277/308266/294269/25747/360750/29142/290257/364403/500152/171577/691992/64545/117516/287989/25408/312102/29373/287287	46
BP	GO:0019730	antimicrobial humoral response	21/939	146/18112	2.09095e-05	0.0110635	0.0108192	306748/171162/298006/499658/170568/25335/299606/24618/64389/316010/24903/29300/641624/613223/360750/290257/171016/171551/24714/24620/246358	21
BP	GO:0050866	negative regulation of cell activation	28/939	231/18112	2.60716e-05	0.0124153	0.0121411	113955/501043/59105/66029/64569/366126/499658/24367/295338/63835/292594/366518/295518/24481/84586/24903/170637/309621/685277/308266/290257/289211/364403/367901/116592/25408/312102/287287	28
BP	GO:0090596	sensory organ morphogenesis	35/939	325/18112	3.55015e-05	0.0153689	0.0150295	24388/85272/266603/282836/25654/266714/295691/305066/360417/313592/171302/60357/54264/293537/304729/29349/363259/361752/367152/689704/171360/317674/304825/360737/308596/361586/298878/83839/680149/298504/54284/366069/293538/303741/288736	35
BP	GO:0010951	negative regulation of endopeptidase activity	31/939	278/18112	5.06566e-05	0.0195099	0.0190791	287631/685136/306417/691375/108348108/29345/304688/287357/81687/306251/257643/406161/60325/314406/24903/116558/295703/298107/171016/691998/191570/301026/288001/266775/286926/25030/689570/304692/408236/304690/25377	31
BP	GO:0002683	negative regulation of immune system process	43/939	441/18112	5.3261e-05	0.0195099	0.0190791	113955/501043/59105/298006/66029/64569/366126/25556/499658/25239/25717/295338/54264/288905/63835/292844/292594/289010/501177/679957/366518/295518/24481/84586/24903/170637/246253/295703/25081/309621/685277/308266/360750/290257/289211/364403/367901/117033/116592/25408/312102/25110/287287	43
BP	GO:1903038	negative regulation of leukocyte cell-cell adhesion	20/939	146/18112	6.61951e-05	0.0225158	0.0220186	113955/501043/298006/66029/295338/63835/292594/366518/24481/84586/24903/309621/685277/308266/25747/360750/290257/25408/312102/287287	20
BP	GO:0010466	negative regulation of peptidase activity	31/939	283/18112	7.09408e-05	0.0225213	0.022024	287631/685136/306417/691375/108348108/29345/304688/287357/81687/306251/257643/406161/60325/314406/24903/116558/295703/298107/171016/691998/191570/301026/288001/266775/286926/25030/689570/304692/408236/304690/25377	31
BP	GO:0042742	defense response to bacterium	33/939	314/18112	9.45079e-05	0.0281279	0.0275068	25410/499658/338457/170568/25335/288905/303414/299606/690894/24618/289337/64389/641637/366518/24481/24932/29469/641643/316010/641624/641647/503254/613223/290257/362629/309114/362881/641653/641623/641630/293426/24620/498157	33
BP	GO:0002440	production of molecular mediator of immune response	26/939	225/18112	0.000111479	0.0312273	0.0305377	317578/29337/338457/362364/25717/295338/25335/288905/299606/292844/292594/366518/295518/64025/24481/25081/309621/308163/294269/502832/317674/289211/367901/291675/305000/287287	26
BP	GO:0050672	negative regulation of lymphocyte proliferation	15/939	96/18112	0.00011966	0.0316567	0.0309576	113955/501043/66029/64569/63835/292594/366518/24903/309621/308266/289211/364403/367901/25408/312102	15
BP	GO:0032945	negative regulation of mononuclear cell proliferation	15/939	97/18112	0.000134882	0.0338057	0.0330591	113955/501043/66029/64569/63835/292594/366518/24903/309621/308266/289211/364403/367901/25408/312102	15
BP	GO:0007159	leukocyte cell-cell adhesion	37/939	376/18112	0.00014404	0.0342958	0.0335385	113955/85272/317578/501043/25713/499099/298006/66029/295338/288905/63835/299606/292594/362282/309684/366518/64025/24481/24932/84586/24903/308995/363930/309621/685277/308266/294269/25747/360750/29142/290257/691992/64545/117516/25408/312102/287287	37
BP	GO:0002274	myeloid leukocyte activation	28/939	257/18112	0.000170991	0.0385984	0.0377461	295706/59105/499099/29337/29385/366126/25556/338457/25172/60462/317676/292594/63849/309684/295518/64025/24481/29469/316010/81511/290257/364403/29168/367901/309114/116592/312102/287287	28
BP	GO:0070663	regulation of leukocyte proliferation	29/939	271/18112	0.000180104	0.0385984	0.0377461	113955/317578/501043/66029/64569/338457/306417/295338/288905/63835/292844/292594/171081/366518/64025/24932/25668/24903/308995/309621/308266/289211/364403/367901/291675/24694/25408/312102/287287	29
BP	GO:0070661	leukocyte proliferation	35/939	353/18112	0.000186427	0.0385984	0.0377461	113955/317578/501043/66029/60628/64569/338457/306417/295338/288905/63835/292844/292594/171081/309684/366518/501100/64025/24481/24932/25668/24903/308995/116558/309621/308266/289211/364403/367901/291675/117516/24694/25408/312102/287287	35
BP	GO:0002697	regulation of immune effector process	39/939	410/18112	0.000195786	0.0388471	0.0379893	317578/501043/24988/499099/29337/366126/499658/503650/338457/25172/362364/25717/295338/288905/108348108/292844/292594/289010/362282/309684/366518/295518/64025/24481/29469/84586/295703/25081/294269/500338/317674/289211/364403/367901/291675/312102/310693/25110/287287	39
BP	GO:0070664	negative regulation of leukocyte proliferation	15/939	102/18112	0.000238927	0.043873	0.0429042	113955/501043/66029/64569/63835/292594/366518/24903/309621/308266/289211/364403/367901/25408/312102	15
BP	GO:0050670	regulation of lymphocyte proliferation	27/939	249/18112	0.000239542	0.043873	0.0429042	113955/317578/501043/66029/64569/338457/306417/295338/288905/63835/292844/292594/366518/64025/24932/25668/24903/308995/309621/308266/289211/364403/367901/291675/25408/312102/287287	27
BP	GO:0050830	defense response to Gram-positive bacterium	17/939	126/18112	0.000273899	0.0481372	0.0470742	499658/170568/25335/288905/24618/64389/641637/366518/29469/316010/641624/503254/613223/290257/362881/641630/24620	17
BP	GO:0051346	negative regulation of hydrolase activity	37/939	389/18112	0.000283041	0.0481372	0.0470742	287631/685136/306417/691375/108348108/29345/304688/287357/81687/689388/306251/257643/406161/60325/314406/24903/24536/307169/116558/295703/25081/298107/171016/691998/191570/301026/288001/266775/286926/25030/689570/304692/408236/266708/114214/304690/25377	37
CC	GO:0030312	external encapsulating structure	47/970	410/18418	4.53188e-07	0.000201215	0.000201215	290905/85272/282836/303861/25654/25613/679668/116640/29195/81828/25556/314280/313592/170568/314981/362364/25717/64057/314626/24367/25335/63849/306805/81687/689388/304913/29393/314772/306251/85271/364405/314917/84586/315879/289525/305253/64563/309368/500152/117033/313954/309114/691992/117061/501231/79110/116669	47
CC	GO:0031012	extracellular matrix	46/970	408/18418	9.59354e-07	0.000212977	0.000212977	290905/85272/282836/303861/25654/25613/679668/116640/29195/81828/25556/314280/313592/170568/314981/362364/25717/64057/314626/24367/25335/63849/306805/81687/689388/304913/29393/314772/306251/85271/364405/84586/315879/289525/305253/64563/309368/500152/117033/313954/309114/691992/117061/501231/79110/116669	46
CC	GO:0009897	external side of plasma membrane	44/970	461/18418	0.000103788	0.0153606	0.0153606	24988/60628/29385/25556/503650/24367/288905/406160/117027/63835/171081/24210/81725/360654/29349/100124593/25746/309684/366518/500598/64025/24932/362431/24536/308995/84475/288375/309621/308163/83577/29187/500338/24336/289211/300678/293594/691992/64545/25408/498157/25110/50719/287287/116669	44
MF	GO:0005549	odorant binding	84/895	395/16650	2.53276e-28	1.74254e-25	1.68495e-25	295744/404885/300551/293597/405021/404853/404861/405311/405995/295751/293599/362821/404989/287321/405031/113911/405094/309221/293383/259244/295766/405097/405971/293389/259247/405929/293601/405026/295735/404898/404891/293773/405999/404859/405925/405980/404892/293793/289250/405943/405100/301610/405251/405032/300565/298107/366108/293817/293435/293816/295839/293399/405045/293805/293594/295715/366104/…	84
MF	GO:0001653	peptide receptor activity	26/895	155/16650	2.1363e-07	7.34887e-05	7.10601e-05	81753/60628/29385/688730/58965/171044/117027/295144/292413/113911/310327/100124593/25321/25264/363866/84475/302619/140595/59264/308163/64042/24603/690230/114099/29235/24182	26
MF	GO:0140375	immune receptor activity	23/895	131/16650	4.6086e-07	0.00010569	0.000102198	501043/60628/29385/25556/288905/117027/171081/292413/100124593/25746/24932/361493/690906/24536/84475/308163/24336/289211/362629/690230/25110/25046/117539	23
MF	GO:0008528	G protein-coupled peptide receptor activity	24/895	146/16650	9.07886e-07	0.000156156	0.000150996	81753/60628/29385/688730/58965/171044/117027/295144/292413/310327/100124593/25321/25264/363866/84475/302619/140595/59264/308163/64042/690230/114099/29235/24182	24
MF	GO:0004896	cytokine receptor activity	16/895	95/16650	4.30013e-05	0.00510178	0.00493318	501043/60628/29385/25556/288905/117027/171081/100124593/25746/24932/24536/84475/308163/24336/362629/117539	16
MF	GO:0004252	serine-type endopeptidase activity	25/895	194/16650	4.44923e-05	0.00510178	0.00493318	408240/299606/63849/81687/192262/300682/292848/54249/408244/302971/102553035/408204/290257/408247/171290/691670/362653/24691/308562/287136/29265/310693/266708/266704/362346	25
MF	GO:0042379	chemokine receptor binding	13/895	68/16650	5.72948e-05	0.00563126	0.00544516	306748/298006/64389/641637/641624/641647/685958/360750/171551/116592/641623/641630/246358	13
MF	GO:0004866	endopeptidase inhibitor activity	24/895	194/16650	0.000120056	0.0097848	0.00946144	287631/691375/29345/304688/306251/257643/406161/60325/314406/24903/295703/298107/171016/191570/301026/288001/266775/286926/25030/689570/304692/408236/304690/25377	24
MF	GO:0061135	endopeptidase regulator activity	25/895	208/16650	0.000139148	0.0097848	0.00946144	287631/691375/29345/304688/306251/257643/406161/60325/314406/24903/295703/298107/171016/691998/191570/301026/288001/266775/286926/25030/689570/304692/408236/304690/25377	25
MF	GO:0008236	serine-type peptidase activity	25/895	209/16650	0.000150189	0.0097848	0.00946144	408240/299606/63849/81687/192262/300682/292848/54249/408244/302971/102553035/408204/290257/408247/171290/691670/362653/24691/308562/287136/29265/310693/266708/266704/362346	25
MF	GO:0030414	peptidase inhibitor activity	24/895	198/16650	0.000164863	0.0097848	0.00946144	287631/691375/29345/304688/306251/257643/406161/60325/314406/24903/295703/298107/171016/191570/301026/288001/266775/286926/25030/689570/304692/408236/304690/25377	24
MF	GO:0031731	CCR6 chemokine receptor binding	6/895	17/16650	0.000175942	0.0097848	0.00946144	64389/641637/641624/641647/641623/641630	6
MF	GO:0004867	serine-type endopeptidase inhibitor activity	16/895	107/16650	0.000184887	0.0097848	0.00946144	287631/691375/29345/304688/306251/60325/314406/295703/171016/191570/266775/286926/689570/304692/408236/25377	16
MF	GO:0017171	serine hydrolase activity	25/895	214/16650	0.000217938	0.0107101	0.0103561	408240/299606/63849/81687/192262/300682/292848/54249/408244/302971/102553035/408204/290257/408247/171290/691670/362653/24691/308562/287136/29265/310693/266708/266704/362346	25
MF	GO:0019955	cytokine binding	19/895	144/16650	0.000260201	0.0119345	0.0115401	287631/501043/60628/29385/25556/25717/288905/80722/117027/299606/100124593/25746/366518/24932/24536/84475/308163/362629/117539	19
MF	GO:0061134	peptidase regulator activity	26/895	233/16650	0.000341108	0.0146676	0.0141829	287631/691375/29345/304688/306251/257643/406161/60325/314406/24903/295703/302971/298107/171016/691998/191570/301026/288001/266775/286926/25030/689570/304692/408236/304690/25377	26
MF	GO:0004175	endopeptidase activity	41/895	445/16650	0.000545977	0.022096	0.0213658	408240/293676/25335/299606/63849/81687/192262/300682/292848/54249/316211/29174/408244/315879/315330/302971/305253/680718/102553035/408204/290257/691998/408247/171290/691670/362653/252929/117033/117061/24691/308562/287136/29265/306720/498688/290970/310693/266708/266704/362346/497840	41
MF	GO:0042834	peptidoglycan binding	5/895	14/16650	0.000591158	0.0225954	0.0218486	171162/499658/24618/24714/24620	5
MF	GO:0048018	receptor ligand activity	41/895	458/16650	0.000962462	0.0348513	0.0336995	306748/113955/85272/25616/29368/298006/25717/294503/81648/287357/24659/29349/64389/24481/58937/246253/641624/641647/116558/685958/24283/63878/25081/360750/290257/171551/24952/246250/24714/116592/641623/25569/64368/691552/117516/266804/24694/83711/29373/246358/287287	41
MF	GO:0048020	CCR chemokine receptor binding	9/895	49/16650	0.00106029	0.036474	0.0352686	298006/64389/641637/641624/641647/685958/360750/641623/641630	9
MF	GO:0001848	complement binding	6/895	24/16650	0.00138489	0.0417404	0.040361	291445/689388/309684/406161/295703/312102	6
MF	GO:0016493	C-C chemokine receptor activity	6/895	24/16650	0.00138489	0.0417404	0.040361	60628/29385/117027/100124593/84475/308163	6
MF	GO:0030546	signaling receptor activator activity	41/895	467/16650	0.00139539	0.0417404	0.040361	306748/113955/85272/25616/29368/298006/25717/294503/81648/287357/24659/29349/64389/24481/58937/246253/641624/641647/116558/685958/24283/63878/25081/360750/290257/171551/24952/246250/24714/116592/641623/25569/64368/691552/117516/266804/24694/83711/29373/246358/287287	41
MF	GO:0004950	chemokine receptor activity	6/895	25/16650	0.00174034	0.0478943	0.0463115	60628/29385/117027/100124593/84475/308163	6
MF	GO:0019957	C-C chemokine binding	6/895	25/16650	0.00174034	0.0478943	0.0463115	60628/29385/117027/100124593/84475/308163	6

## Sheet: Supplemental Table4
Results of KEGG pathways enrichment based on aging datasets.
ID	Description	GeneRatio	BgRatio	pvalue	p.adjust	qvalue	geneID	Count
rno04060	Cytokine-cytokine receptor interaction	37/543	269/8963	2.04174e-06	0.000579853	0.000579853	306748/85272/501043/298006/60628/29385/25556/25717/294503/288905/25069/117027/690894/171081/100124593/25746/366518/500598/24481/24932/500836/24536/84475/116558/685958/287034/308163/360750/24336/362629/171551/117516/83711/29373/117539/246358/287287	37
rno05150	Staphylococcus aureus infection	19/543	100/8963	7.03467e-06	0.000998924	0.000998924	24367/192262/64389/54249/309684/406161/316010/641624/308995/363930/309621/287697/294269/613223/289211/690230/287679/450228/266717	19
rno04061	Viral protein interaction with cytokine and cytokine receptor	16/543	85/8963	4.17938e-05	0.00395648	0.00395648	306748/501043/298006/60628/29385/117027/25746/366518/84475/685958/308163/360750/362629/171551/117539/246358	16
rno04672	Intestinal immune network for IgA production	10/543	43/8963	0.000190642	0.0135356	0.0135356	25713/60628/287034/309621/294269/360750/64545/25408/25046/287287	10

## Sheet: Supplemental Table5
Results of GO enrichment based on co-DEGs.
ONTOLOGY	ID	Description	GeneRatio	BgRatio	pvalue	p.adjust	qvalue	geneID	Count
BP	GO:0006959	humoral immune response	5/15	249/18112	1.26599e-06	0.000768452	0.000425896	306748/24618/54249/295703/289211	5
BP	GO:0002478	antigen processing and presentation of exogenous peptide antigen	3/15	33/18112	2.4702e-06	0.000768452	0.000425896	362431/294269/289211	3
BP	GO:0001818	negative regulation of cytokine production	5/15	295/18112	2.9108e-06	0.000768452	0.000425896	113955/292594/362431/289211/84356	5
BP	GO:0019884	antigen processing and presentation of exogenous antigen	3/15	41/18112	4.80714e-06	0.000951814	0.000527521	362431/294269/289211	3
BP	GO:0048002	antigen processing and presentation of peptide antigen	3/15	66/18112	2.03805e-05	0.00252291	0.00139826	362431/294269/289211	3
BP	GO:0032720	negative regulation of tumor necrosis factor production	3/15	67/18112	2.13253e-05	0.00252291	0.00139826	113955/292594/362431	3
BP	GO:1903556	negative regulation of tumor necrosis factor superfamily cytokine production	3/15	68/18112	2.22984e-05	0.00252291	0.00139826	113955/292594/362431	3
BP	GO:0050672	negative regulation of lymphocyte proliferation	3/15	96/18112	6.26929e-05	0.00549432	0.0030451	113955/292594/289211	3
BP	GO:0032945	negative regulation of mononuclear cell proliferation	3/15	97/18112	6.46616e-05	0.00549432	0.0030451	113955/292594/289211	3
BP	GO:0070664	negative regulation of leukocyte proliferation	3/15	102/18112	7.5114e-05	0.00549432	0.0030451	113955/292594/289211	3
BP	GO:0002468	dendritic cell antigen processing and presentation	2/15	16/18112	7.631e-05	0.00549432	0.0030451	362431/294269	2
BP	GO:0002253	activation of immune response	4/15	298/18112	8.49572e-05	0.00560717	0.00310764	292594/54249/295703/289211	4
BP	GO:0002921	negative regulation of humoral immune response	2/15	18/18112	9.72022e-05	0.0056976	0.00315776	295703/289211	2
BP	GO:0019882	antigen processing and presentation	3/15	114/18112	0.00010457	0.0056976	0.00315776	362431/294269/289211	3
BP	GO:0002449	lymphocyte mediated immunity	4/15	317/18112	0.000107909	0.0056976	0.00315776	292594/295703/294269/289211	4
BP	GO:0002460	adaptive immune response based on somatic recombination of immune receptors built from immunoglobulin superfamily domains	4/·15	330/18112	0.000126019	0.00583793	0.00323553	292594/295703/294269/289211	4
BP	GO:0019886	antigen processing and presentation of exogenous peptide antigen via MHC class II	2/15	21/18112	0.000133223	0.00583793	0.00323553	294269/289211	2
BP	GO:0032693	negative regulation of interleukin-10 production	2/15	22/18112	0.000146476	0.00583793	0.00323553	292594/289211	2
BP	GO:1900016	negative regulation of cytokine production involved in inflammatory response	2/15	22/18112	0.000146476	0.00583793	0.00323553	292594/84356	2
BP	GO:0002698	negative regulation of immune effector process	3/15	128/18112	0.000147422	0.00583793	0.00323553	292594/295703/289211	3
BP	GO:0045591	positive regulation of regulatory T cell differentiation	2/15	24/18112	0.000174842	0.00659406	0.0036546	292594/294269	2
BP	GO:0002495	antigen processing and presentation of peptide antigen via MHC class II	2/15	25/18112	0.000189955	0.00683839	0.00379002	294269/289211	2
BP	GO:0007159	leukocyte cell-cell adhesion	4/15	376/18112	0.000208117	0.00716648	0.00397185	113955/85272/292594/294269	4
BP	GO:0002504	antigen processing and presentation of peptide or polysaccharide antigen via MHC class II	2/15	27/18112	0.000222035	0.00732716	0.0040609	294269/289211	2
BP	GO:0016064	immunoglobulin mediated immune response	3/15	154/18112	0.000254457	0.00806119	0.00446772	295703/294269/289211	3
BP	GO:0019724	B cell mediated immunity	3/15	159/18112	0.000279531	0.00849931	0.00471054	295703/294269/289211	3
BP	GO:0002697	regulation of immune effector process	4/15	410/18112	0.000289749	0.00849931	0.00471054	292594/295703/294269/289211	4
BP	GO:0002250	adaptive immune response	4/15	415/18112	0.000303452	0.00850874	0.00471577	292594/295703/294269/289211	4
BP	GO:0002443	leukocyte mediated immunity	4/15	423/18112	0.000326341	0.00850874	0.00471577	292594/295703/294269/289211	4
BP	GO:0036037	CD8-positive, alpha-beta T cell activation	2/15	33/18112	0.000333044	0.00850874	0.00471577	292594/362431	2
BP	GO:0050858	negative regulation of antigen receptor-mediated signaling pathway	2/15	33/18112	0.000333044	0.00850874	0.00471577	292594/289211	2
BP	GO:0051250	negative regulation of lymphocyte activation	3/15	176/18112	0.000376617	0.00885024	0.00490504	113955/292594/289211	3
BP	GO:0002683	negative regulation of immune system process	4/15	441/18112	0.000382364	0.00885024	0.00490504	113955/292594/295703/289211	4
BP	GO:0046631	alpha-beta T cell activation	3/15	180/18112	0.000402236	0.00885024	0.00490504	292594/362431/294269	3
BP	GO:0032640	tumor necrosis factor production	3/15	182/18112	0.000415456	0.00885024	0.00490504	113955/292594/362431	3
BP	GO:0032680	regulation of tumor necrosis factor production	3/15	182/18112	0.000415456	0.00885024	0.00490504	113955/292594/362431	3
BP	GO:0050777	negative regulation of immune response	3/15	182/18112	0.000415456	0.00885024	0.00490504	292594/295703/289211	3
BP	GO:0071706	tumor necrosis factor superfamily cytokine production	3/15	185/18112	0.000435807	0.00885024	0.00490504	113955/292594/362431	3
BP	GO:1903555	regulation of tumor necrosis factor superfamily cytokine production	3/15	185/18112	0.000435807	0.00885024	0.00490504	113955/292594/362431	3
BP	GO:0022407	regulation of cell-cell adhesion	4/15	463/18112	0.000459867	0.00900287	0.00498963	113955/85272/292594/294269	4
BP	GO:0002701	negative regulation of production of molecular mediator of immune response	2/15	39/18112	0.000466058	0.00900287	0.00498963	292594/289211	2
BP	GO:0045589	regulation of regulatory T cell differentiation	2/15	40/18112	0.000490352	0.00924664	0.00512473	292594/294269	2
BP	GO:0051249	regulation of lymphocyte activation	4/15	481/18112	0.000531197	0.00978391	0.0054225	113955/292594/294269/289211	4
BP	GO:0045066	regulatory T cell differentiation	2/15	44/18112	0.000593573	0.0104826	0.00580974	292594/294269	2
BP	GO:0002822	regulation of adaptive immune response based on somatic recombination of immune receptors built from immunoglobulin superfamily domains	3/15	207/18112	0.000604903	0.0104826	0.00580974	292594/294269/289211	3
BP	GO:0002695	negative regulation of leukocyte activation	3/15	208/18112	0.00061345	0.0104826	0.00580974	113955/292594/289211	3
BP	GO:0002706	regulation of lymphocyte mediated immunity	3/15	209/18112	0.000622074	0.0104826	0.00580974	292594/294269/289211	3
BP	GO:0002819	regulation of adaptive immune response	3/15	220/18112	0.000722113	0.0118982	0.00659429	292594/294269/289211	3
BP	GO:0002920	regulation of humoral immune response	2/15	49/18112	0.000736125	0.0118982	0.00659429	295703/289211	2
BP	GO:0002440	production of molecular mediator of immune response	3/15	225/18112	0.000770789	0.0122093	0.00676671	292594/294269/289211	3
BP	GO:0046638	positive regulation of alpha-beta T cell differentiation	2/15	51/18112	0.000797331	0.0123821	0.00686248	292594/294269	2
BP	GO:0050866	negative regulation of cell activation	3/15	231/18112	0.000831911	0.0126706	0.00702241	113955/292594/289211	3
BP	GO:0002455	humoral immune response mediated by circulating immunoglobulin	2/15	55/18112	0.000926882	0.0138508	0.00767646	295703/289211	2
BP	GO:0006956	complement activation	2/15	58/18112	0.00103026	0.014286	0.00791765	54249/295703	2
BP	GO:0050670	regulation of lymphocyte proliferation	3/15	249/18112	0.0010336	0.014286	0.00791765	113955/292594/289211	3
BP	GO:0002534	cytokine production involved in inflammatory response	2/15	59/18112	0.0010659	0.014286	0.00791765	292594/84356	2
BP	GO:0002823	negative regulation of adaptive immune response based on somatic recombination of immune receptors built from immunoglobulin superfamily domains	2/15	59/18112	0.0010659	0.014286	0.00791765	292594/289211	2
BP	GO:1900015	regulation of cytokine production involved in inflammatory response	2/15	59/18112	0.0010659	0.014286	0.00791765	292594/84356	2
BP	GO:0006898	receptor-mediated endocytosis	3/15	253/18112	0.00108227	0.014286	0.00791765	58965/292594/289211	3
BP	GO:0032944	regulation of mononuclear cell proliferation	3/15	253/18112	0.00108227	0.014286	0.00791765	113955/292594/289211	3
BP	GO:0032355	response to estradiol	3/15	257/18112	0.00113237	0.0147022	0.00814837	85272/24618/289211	3
BP	GO:0002707	negative regulation of lymphocyte mediated immunity	2/15	63/18112	0.00121434	0.0150349	0.00833274	292594/289211	2
BP	GO:0050854	regulation of antigen receptor-mediated signaling pathway	2/15	63/18112	0.00121434	0.0150349	0.00833274	292594/289211	2
BP	GO:0002820	negative regulation of adaptive immune response	2/15	64/18112	0.00125291	0.0150349	0.00833274	292594/289211	2
BP	GO:0032613	interleukin-10 production	2/15	64/18112	0.00125291	0.0150349	0.00833274	292594/289211	2
BP	GO:0032653	regulation of interleukin-10 production	2/15	64/18112	0.00125291	0.0150349	0.00833274	292594/289211	2
BP	GO:0070663	regulation of leukocyte proliferation	3/15	271/18112	0.00131926	0.0155948	0.00864305	113955/292594/289211	3
BP	GO:0002703	regulation of leukocyte mediated immunity	3/15	280/18112	0.00144912	0.0168779	0.0093542	292594/294269/289211	3
BP	GO:0046637	regulation of alpha-beta T cell differentiation	2/15	71/18112	0.00153922	0.0176676	0.00979186	292594/294269	2
BP	GO:0022409	positive regulation of cell-cell adhesion	3/15	292/18112	0.00163445	0.0184926	0.0102491	85272/292594/294269	3
BP	GO:0002704	negative regulation of leukocyte mediated immunity	2/15	76/18112	0.00176109	0.019372	0.0107365	292594/289211	2
BP	GO:0046635	positive regulation of alpha-beta T cell activation	2/15	76/18112	0.00176109	0.019372	0.0107365	292594/294269	2
BP	GO:0042130	negative regulation of T cell proliferation	2/15	79/18112	0.00190111	0.0206257	0.0114313	113955/292594	2
BP	GO:0046651	lymphocyte proliferation	3/15	323/18112	0.00218046	0.0233368	0.0129339	113955/292594/289211	3
BP	GO:0032943	mononuclear cell proliferation	3/15	327/18112	0.00225823	0.0238469	0.0132166	113955/292594/289211	3
BP	GO:0002532	production of molecular mediator involved in inflammatory response	2/15	88/18112	0.0023519	0.0245093	0.0135837	292594/84356	2
BP	GO:1903037	regulation of leukocyte cell-cell adhesion	3/15	336/18112	0.00243949	0.0250919	0.0139066	113955/292594/294269	3
BP	GO:0050863	regulation of T cell activation	3/15	343/18112	0.00258659	0.0262638	0.0145561	113955/292594/294269	3
BP	GO:0070661	leukocyte proliferation	3/15	353/18112	0.00280615	0.0281326	0.0155918	113955/292594/289211	3
BP	GO:0002709	regulation of T cell mediated immunity	2/15	101/18112	0.00308347	0.0301495	0.0167097	292594/294269	2
BP	GO:0045582	positive regulation of T cell differentiation	2/15	101/18112	0.00308347	0.0301495	0.0167097	292594/294269	2
BP	GO:0061844	antimicrobial humoral immune response mediated by antimicrobial peptide	2/15	108/18112	0.0035162	0.0339614	0.0188223	306748/24618	2
BP	GO:0106027	neuron projection organization	2/15	111/18112	0.00370988	0.0354003	0.0196198	289211/84356	2
BP	GO:0046634	regulation of alpha-beta T cell activation	2/15	114/18112	0.00390846	0.0368512	0.0204239	292594/294269	2
BP	GO:0045621	positive regulation of lymphocyte differentiation	2/15	117/18112	0.00411191	0.0383133	0.0212343	292594/294269	2
BP	GO:1901214	regulation of neuron death	3/15	406/18112	0.00416261	0.0383347	0.0212461	113955/24618/289211	3
BP	GO:0046632	alpha-beta T cell differentiation	2/15	126/18112	0.00475131	0.0432533	0.0239721	292594/294269	2
BP	GO:0002377	immunoglobulin production	2/15	130/18112	0.00504936	0.0449336	0.0249034	294269/289211	2
BP	GO:0002456	T cell mediated immunity	2/15	130/18112	0.00504936	0.0449336	0.0249034	292594/294269	2
BP	GO:0030282	bone mineralization	2/15	131/18112	0.0051252	0.0451017	0.0249966	113955/85272	2
BP	GO:0002526	acute inflammatory response	2/15	135/18112	0.00543382	0.0467781	0.0259257	24618/289211	2
BP	GO:0050868	negative regulation of T cell activation	2/15	135/18112	0.00543382	0.0467781	0.0259257	113955/292594	2
BP	GO:0070997	neuron death	3/15	454/18112	0.0056871	0.048432	0.0268423	113955/24618/289211	3
BP	GO:0031623	receptor internalization	2/15	139/18112	0.00575084	0.0484539	0.0268544	58965/292594	2

## Sheet: Supplemental Table6
Results of KEGG pathways enrichment based on co-DEGs.
ID	Description	GeneRatio	BgRatio	pvalue	p.adjust	qvalue	geneID	Count
rno04610	Complement and coagulation cascades	3/11	86/8956	0.000133437	0.00428155	0.00351758	54249/60325/295703	3
rno05150	Staphylococcus aureus infection	3/11	100/8956	0.000208856	0.00428155	0.00351758	54249/294269/289211	3
